# Supplementary material for: Elicitation of Norwegian EQ-5D-5L values for hypothetical and experience-based health states based on the EuroQol Valuation Technology (EQ-VT) protocol
Source: PubMed Central journal article supplement — BMJ Open. 2020 Jun 11;10(6):e034683. doi: 10.1136/bmjopen-2019-034683 (PMC7295408; doi:10.1136/bmjopen-2019-034683), 2020-06-11
Supplement: bmjopen-2019-034683.draft_revisions.pdf [file bmjopen-2019-034683.draft_revisions.pdf]

# BMJ Open

BMJ Open is committed to open peer review. As part of this commitment we make the peer review history of every article we publish publicly available.

When an article is published we post the peer reviewers' comments and the authors' responses online. We also post the versions of the paper that were used during peer review. These are the versions that the peer review comments apply to.

The versions of the paper that follow are the versions that were submitted during the peer review process. They are not the versions of record or the final published versions. They should not be cited or distributed as the published version of this manuscript.

BMJ Open is an open access journal and the full, final, typeset and author-corrected version of record of the manuscript is available on our site with no access controls, subscription charges or pay-per-view fees (<http://bmjopen.bmj.com>).

If you have any questions on BMJ Open's open peer review process please email [info.bmjopen@bmj.com](mailto:info.bmjopen@bmj.com)

# BMJ Open

## Elicitation of a Norwegian EQ-5D-5L Value Set for Hypothetical and Experience-based Health States Based on the EuroQol Valuation Technology (EQ-VT) Protocol

|                               |                                                                                                                                                                                                                                                                                                                                                                                                                                                                                                                                                   |
|-------------------------------|---------------------------------------------------------------------------------------------------------------------------------------------------------------------------------------------------------------------------------------------------------------------------------------------------------------------------------------------------------------------------------------------------------------------------------------------------------------------------------------------------------------------------------------------------|
| Journal:                      | <i>BMJ Open</i>                                                                                                                                                                                                                                                                                                                                                                                                                                                                                                                                   |
| Manuscript ID                 | bmjopen-2019-034683                                                                                                                                                                                                                                                                                                                                                                                                                                                                                                                               |
| Article Type:                 | Protocol                                                                                                                                                                                                                                                                                                                                                                                                                                                                                                                                          |
| Date Submitted by the Author: | 01-Oct-2019                                                                                                                                                                                                                                                                                                                                                                                                                                                                                                                                       |
| Complete List of Authors:     | Hansen, Tonya; Norwegian Institute of Public Health, Health Services Research<br>Helland, Ylva; Norwegian Institute of Public Health, Health Services Research<br>Augestad, Liv ; University of Oslo Faculty of Medicine, Health Management and Health Economics<br>Rand, Kim; Akershus University Hospital, Health Services Research Unit<br>Stavem, K; University of Oslo, Institute of Clinical Medicine; Akershus University Hospital, Pulmonary Medicine<br>Garratt, Andrew ; Norwegian Institute of Public Health, Health Services Research |
| Keywords:                     | Health economics < HEALTH SERVICES ADMINISTRATION & MANAGEMENT, HEALTH ECONOMICS, Health policy < HEALTH SERVICES ADMINISTRATION & MANAGEMENT, QUALITATIVE RESEARCH                                                                                                                                                                                                                                                                                                                                                                               |
|                               |                                                                                                                                                                                                                                                                                                                                                                                                                                                                                                                                                   |

SCHOLARONE™  
Manuscripts

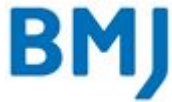

I, the Submitting Author has the right to grant and does grant on behalf of all authors of the Work (as defined in the below author licence), an exclusive licence and/or a non-exclusive licence for contributions from authors who are: i) UK Crown employees; ii) where BMJ has agreed a CC-BY licence shall apply, and/or iii) in accordance with the terms applicable for US Federal Government officers or employees acting as part of their official duties; on a worldwide, perpetual, irrevocable, royalty-free basis to BMJ Publishing Group Ltd ("BMJ") its licensees and where the relevant Journal is co-owned by BMJ to the co-owners of the Journal, to publish the Work in this journal and any other BMJ products and to exploit all rights, as set out in our [licence](#).

The Submitting Author accepts and understands that any supply made under these terms is made by BMJ to the Submitting Author unless you are acting as an employee on behalf of your employer or a postgraduate student of an affiliated institution which is paying any applicable article publishing charge ("APC") for Open Access articles. Where the Submitting Author wishes to make the Work available on an Open Access basis (and intends to pay the relevant APC), the terms of reuse of such Open Access shall be governed by a Creative Commons licence – details of these licences and which [Creative Commons](#) licence will apply to this Work are set out in our licence referred to above.

Other than as permitted in any relevant BMJ Author's Self Archiving Policies, I confirm this Work has not been accepted for publication elsewhere, is not being considered for publication elsewhere and does not duplicate material already published. I confirm all authors consent to publication of this Work and authorise the granting of this licence.

1  
2  
3 **1 Elicitation of a Norwegian EQ-5D-5L Value Set for Hypothetical and Experience-based**  
4  
5 **2 Health States Based on the EuroQol Valuation Technology (EQ-VT) Protocol**  
6  
7  
8  
9

10 4 Tonya Moen Hansen, MSc<sup>1</sup> tonyamoen.hansen@fhi.no  
11  
12 5 Ylva Helland, PhD<sup>1</sup> ylva.helland@fhi.no  
13  
14 6 Liv Ariane Augestad, PhD<sup>2</sup> l.a.augestad@medisin.uio.no  
15  
16 7 Kim Rand, PhD<sup>3</sup> kim.rand@ahus.no  
17  
18 8 Knut Stavem, MD, MPH, PhD<sup>3-5</sup> knut.stavem@medisin.uio.no  
19  
20 9 Andrew Garratt, PhD<sup>1</sup> andrew.garratt@fhi.no  
21  
22  
23  
24

25 11 <sup>1</sup>Division for Health Services, Norwegian Institute of Public Health, Oslo, Norway

26  
27 12 <sup>2</sup>Department of Health Management and Health Economics, Medical Faculty, University of Oslo,  
28  
29 13 Oslo, Norway

30  
31 14 <sup>3</sup>Health Services Research Unit, Akershus University Hospital, Norway

32  
33 15 <sup>4</sup>Institute of Clinical Medicine, University of Oslo, Norway

34  
35 16 <sup>5</sup>Department of Pulmonary Medicine, Medical Division, Akershus University Hospital, Norway  
36  
37  
38

39 18 Corresponding author:

40  
41 19 Tonya Moen Hansen  
42  
43  
44  
45

46 21 Word count: 3447  
47  
48  
49

50  
51 **23 Abstract**

52  
53 24 **Introduction** Norway is one of several European countries that lacks a national value set and  
54  
55 25 hence scoring algorithm for the EQ-5D. Recent studies have found differences between  
56  
57 26 countries in terms of health values or preferences for health states described by instruments  
58  
59 27 such as the EQ-5D. The project aims to model a national EQ-5D-5L value set based on values

1  
2  
3 28 elicited from a representative sample of the Norwegian adult general population in terms of  
4  
5 29 age, sex, and level of education. Using a sampling strategy that supports the collection of  
6  
7 30 values for both hypothetical and experienced health states, the study will have the additional  
8  
9 31 aim of assessing the feasibility of collecting experience-based values as part of a general  
10  
11 32 population valuation study, and statistically comparing values given.  
12  
13  
14

15 33 **Methods and analysis** Multi-stage random sampling and quota-sampling will be used to  
16  
17 34 ensure representativeness. To increase the number of valuations of experienced health states,  
18  
19 35 those with less than perfect health will be over-sampled, increasing the total number of  
20  
21 36 interviews from 1000 to 1500. Values for EQ-5D-5L health states will be obtained through  
22  
23 37 computer assisted face-to-face, one-to-one interviews including the use of composite time  
24  
25 38 trade-off (cTTO) and discrete choice experiments (DCE). The latest protocol for valuation  
26  
27 39 will be followed, using EuroQol Portable Valuation Technology (EQ-PVT). Health state  
28  
29 40 values for all EQ-5D-5L health states will be estimated through statistical modelling of the  
30  
31 41 survey data. Sampling weights will compensate for the over-sampling of those in less than  
32  
33 42 perfect health in the final national value set.  
34  
35  
36  
37  
38  
39

40 43 **Ethics and dissemination** The study has been reviewed and found to be outside of the scope  
41  
42 44 of the ethics committee thus not in need of ethical approval. The findings of this study will be  
43  
44 45 disseminated through peer-reviewed publications, conference presentations, and condensed  
45  
46 46 summaries for key stakeholders and partners in the field.  
47  
48  
49

50 47 **Keywords:** Utilities, Health state valuation, EQ-5D, Time trade-off, QALY  
51  
52  
53  
54  
55  
56  
57  
58  
59  
60

## 48 **Article summary**

### 49 Strengths and limitations of this study

- 50 • This is the first Norwegian valuation study with cTTO and DCE undertaken on a scale  
51 large enough to meet the recommendations of the most recent EQ-5D protocol.
- 52 • Data collection complying to the most recent EQ-5D protocol, with the additional aim  
53 of comparing valuations of hypothetical and experience-based health states.
- 54 • Sampling strategy designed specifically to both ensure representativeness of the final  
55 sample according to geographical region, age, sex and educational level and increase  
56 the number of experience-based valuations.

## 58 **Introduction**

59 Economic evaluation undertaken by the Norwegian Institute of Public Health and the  
60 Norwegian Medicine Agency increasingly informs decisions about the introduction of new  
61 drugs and other health technologies in Norway [1, 2]. The Norheim Committee [3] and  
62 Magnussen Working Group [4] proposed methods to enhance the quality of economic  
63 evaluation, thereby further strengthening the role of economic evaluation in decision-making.  
64 The Ministry of Health followed up these proposals in a 2016 White Paper to Parliament on  
65 principles for priority setting in health care [5].

66  
67 Given the increasing reliance on and impact of economic evaluation, it is important that the  
68 methods it incorporates, including cost-utility analysis, are consistent with societal values  
69 regarding publicly financed health care. Economic evaluation, when taking into account  
70 societal values, often takes the form of cost-utility analyses with the estimation of the  
71 incremental cost per Quality Adjusted Life Year (QALY) gained [6]. QALY takes the integral  
72 of health-related quality of life (HRQoL) over time, with HRQoL represented on a scale

1  
2  
3 73 where 1 indicates a preference equal to that for full health and 0 implying a health state for  
4  
5 74 which preferences do not change with additional time (i.e. preferentially equivalent to not  
6  
7 75 being alive). Values are typically derived using surveys in which respondents consider the  
8  
9  
10 76 relative undesirability of different health states described using instruments such as the EQ-  
11  
12 77 5D. After assigning values to health states, QALYs are calculated by multiplying the health  
13  
14 78 state value by the length of time spent in each. Evaluation of alternative technologies then  
15  
16 79 involves comparison of incremental QALYs gained over incremental costs for new vs.  
17  
18 80 existing technologies. Technologies are compared in terms of their cost per QALY gained at  
19  
20 81 the margin, with priority given to the most cost-effective technologies which maximizes  
21  
22 82 health gains within a fixed budget [7].  
23  
24  
25  
26 83  
27  
28 84 Several instruments are available to calculate QALYs, of which the EQ-5D is by far the most  
29  
30 85 widely applied both internationally and in Norway [8-10]. The EQ-5D is available in over 170  
31  
32 86 languages and national value sets and normative data exist for over 20 countries [11-25]. It is  
33  
34 87 brief, widely tested, and includes five important aspects of health (mobility, self-care, usual  
35  
36 88 activities, pain/discomfort and anxiety/depression), with the most recent version having five  
37  
38 89 levels from no problems to severe problems. The EQ-5D is considered highly acceptable to  
39  
40 90 most patient groups and feasible for application where a short-form general measure of health  
41  
42 91 is required. The instrument has had widespread application in research including clinical  
43  
44 92 trials, population health surveys and more recently as a health care quality indicator as part of  
45  
46 93 the National Health Service for England and Wales Patient Reported Outcomes Measures  
47  
48 94 (PROMs) programme [26, 27] and in the Norwegian [28-31] and Swedish National Quality  
49  
50 95 Registries (NQR) [32]. Registry use of EQ-5D in Norway is likely to increase given the  
51  
52 96 national agreement that the Norwegian Public Health Institute secured in 2018 with EuroQol,  
53  
54 97 the foundation that owns the EQ-5D family of instruments [12].  
55  
56  
57  
58  
59  
60

1  
2  
3 98  
4  
5 99 The Norwegian Medicines Agency recommends the use of EQ-5D in all technology  
6  
7  
8 100 assessments and the use of a -5L tariff for studies where the -5L version has been used [2].  
9  
10 101 The 2018 Agency guidelines presently recommend the use of the EQ-5D-5L tariff for  
11  
12 102 England [15] where EQ-5D-5L has been used. The English tariff has since been critically  
13  
14 103 reviewed following concerns with data quality [33], in which serious deficiencies were  
15  
16 104 revealed. Following these concerns, and in contrast to recommendations of the Norwegian  
17  
18 105 Medicines Agency, NICE continues to recommend the use of the -3L tariff over the -5L tariff,  
19  
20 106 with -5L values mapped onto -3L where needed [34].  
21  
22  
23 107  
24  
25 108 Recent cross-national comparisons of national EQ-5D-5L value sets suggest that there might  
26  
27 109 be substantial differences across countries [13, 35] with culture and values having a role [36].  
28  
29 110 Values for health for the five-level version of the EQ-5D, that are representative for the  
30  
31 111 Norwegian general population, will enhance the validity and legitimacy of economic  
32  
33 112 evaluation in Norway  
34  
35 113  
36  
37 114 Following recommendations that economic evaluation should include societal preferences,  
38  
39 115 existing EQ-5D value sets are largely based on the general population valuing hypothetical  
40  
41 116 health states. In recent years, this approach has been criticised, with some arguing that the  
42  
43 117 general population lack adequate experience or knowledge of health states they are asked to  
44  
45 118 value [37, 38]. An alternative approach involves individuals valuing their own health state to  
46  
47 119 give experience-based values. Sweden's Dental and Pharmaceutical Benefits Agency has  
48  
49 120 stated that experience-based values are preferred [39]. Arguably, patients have a better  
50  
51 121 understanding of the consequences of reduced health on quality of life [38, 40-42]. On the  
52  
53 122 other hand, they may have trouble imagining life in full health or may underreport impact of  
54  
55  
56  
57  
58  
59  
60



1  
2  
3 123 disease due to adaptation or changes in expectations over time. Experience-based valuations,  
4  
5 124 if elicited from representative samples of the general population, may however be suitable for  
6  
7 125 inclusion as societal values. The feasibility of collecting such values and the assessment of  
8  
9 126 how those with less than perfect health value their current health state are new areas for  
10  
11 127 research into health state preferences and valuation.  
12  
13  
14  
15 128

16  
17 129 The aim of the project is to derive a Norwegian EQ-5D-5L value set representative of the age,  
18  
19 130 sex and level of education composition in the Norwegian adult general population.  
20  
21 131 Furthermore, the study design will permit comparisons of experience-based vs. hypothetical  
22  
23 132 health state valuation.  
24  
25

26 133

## 28 134 **Methods and analysis**

29  
30  
31 135 Values for EQ-5D-5L health states will be obtained by electronic data collection including  
32  
33 136 computer assisted face-to-face, one-to-one interviews and the use of composite time trade-off  
34  
35 137 (cTTO) and discrete choice experiments (DCE) [43, 44]. The latest EQ-5D-5L protocol [43-  
36  
37 138 45] will be followed including EuroQol Portable Valuation Technology (EQ-PVT).  
38  
39

40 139

### 42 140 *Sampling*

43  
44  
45 141 Respondents must be aged 18 years or older, resident in Norway, and proficient in  
46  
47 142 Norwegian. Following EQ-VT protocol, sample size is set to a minimum of 1000 individuals  
48  
49 143 with each valuing 10 health states which gives the recommended 10,000 responses [44]. An  
50  
51 144 additional 500 interviews based on the oversampling those with less than perfect health will  
52  
53 145 increase the number of valuations of experienced health states.  
54  
55

56 146

1  
2  
3 147 Norway is a Northern European country with a population of slightly more than 5 million, and  
4  
5 148 a universal health care system. The population covers a comparatively large land mass and for  
6  
7 149 many there may be several hours travel time by car to the nearest hospital or large city.  
8  
9

10 150 Urbanisation has further contributed to variation in demographic characteristics at the regional  
11  
12 151 level. These factors combined with local culture, politics and tradition mean that geographical  
13  
14 152 considerations are important to the design of the study.  
15  
16

17 153  
18  
19 154 The study will use a combination of multistage random sampling of data collection locations  
20  
21 155 and quota sampling on the individual level, ensuring representativeness according to  
22  
23

24 156 geography, age, sex and educational level. The first stage of sampling will be of geographical  
25  
26 157 areas of acute care hospital catchment within each region. Norway has four main regions  
27

28 158 (north, central, west and south-east), with more than half the population residing in the south-  
29  
30 159 eastern region of Norway. The catchment areas served by the 54 acute care hospitals cover all  
31

32  
33 160 Norwegian residents (see Figure 1). They vary considerably in the number of residents that  
34

35 161 they serve, from 15,000 up to 500,000 residents. One acute care hospital will be randomly  
36

37 162 selected from each region with the exception of the south east, where three will be randomly  
38

39  
40 163 selected to account for the disproportionate number of people residing in this region. Hospital  
41

42 164 catchment areas within each region will be sampled with proportional allocation, ensuring  
43

44 165 equal probability proportionate to the number of people residing in each area within the  
45

46  
47 166 region.  
48

49 167  
50

51 168 Within each sampled geographical area, the possible locations for data collection will  
52

53  
54 169 constitute the sample frame for the second stage of sampling (Table 1). Locations will include  
55

56 170 public places (e.g. public libraries, town halls), workplaces, recreational organisations (e.g.  
57

58 171 sports clubs), and healthcare providers (hospitals, rehabilitation institutions). The bodies  
59  
60

1  
2  
3 172 concerned must be willing to grant the study permission for data collection, and cooperate  
4  
5 173 with provision of a suitable space for completion of the interviews. The locations will act as  
6  
7 174 clusters of possible respondents, stratified into groups based on the characteristics of target  
8  
9 175 respondents, e.g. age and educational level. Stratification will increase homogeneity per  
10  
11 176 cluster and ensure the representation of specific groups less likely to participate including  
12  
13 177 those with poorer health, lower socio-economic status, or faced with time constraints,  
14  
15 178 including young children or full-time employment [46]. Locations within each group in the  
16  
17 179 sample frame will be randomly selected. The number of locations selected within each sample  
18  
19 180 frame will be based on the size of the area and quotas.  
20  
21  
22  
23  
24  
25

26 181  
27 182 Within each catchment area and at the respondent level, quota sampling according to age, sex  
28  
29 183 and level of education will be applied (see Table 2 and 3). The total 1300-1500 respondent  
30  
31 184 quota will first be allocated to each region proportionate to the number of people residing in  
32  
33 185 each region. For the three regions where only one hospital catchment area is sampled, the  
34  
35 186 quota for each of these hospital catchment areas will correspond to the regional quota. In the  
36  
37 187 south-eastern region, the regional quota is further allocated to each hospital catchment area  
38  
39 188 proportionate to the number of people residing in each of these areas. To increase the number  
40  
41 189 of respondents who value experienced states of reduced health, a third of the quota per area  
42  
43 190 will comprise those with reduced health. The remaining two thirds of the quota is allocated to  
44  
45 191 groups according to gender, age group (young adults: age 18-34, middle-aged adults: age 35-  
46  
47 192 64, elderly: age 65+) and level of education (lower education: No higher than high school  
48  
49 193 education, higher education: bachelor, masters or PhD) equivalent to the distribution of these  
50  
51 194 attributes in the respective region. The quotas for each group are calculated using  
52  
53 195 microdata.no, a national platform giving researchers instant access to national registries for  
54  
55 196 which Statistics Norway has processing authority, such as the Norwegian National Registry,  
56  
57  
58  
59  
60

1  
2  
3 197 National Education Database, labour market data, register for Personal Tax Payers and FD-  
4  
5 198 Trygd (event history database) [47].  
6  
7  
8 199  
9  
10 200 The study will largely rely on recruitment of potential participants by contacts at each  
11  
12 201 sampled location, but will also invite individuals at each location to volunteer for  
13  
14 202 participation. To enhance participation, the project will be publicised in local newspapers and  
15  
16 203 social media a week in advance of data collection. In addition to the recruitment of  
17  
18 204 respondents through locations, potential respondents will be able to contact the project group  
19  
20 205 for more information about the study and enquire about participation. Potential respondents  
21  
22 206 will be informed of a gift incentive. Cash has been found to be more effective than other  
23  
24 207 incentives for increasing response rates [48, 49] and thus following the interview, respondents  
25  
26 208 will receive a cash card equivalent to 30 Euros.  
27  
28  
29 209 The recruitment strategy will be piloted in the catchment area sampled closest to Oslo.  
30  
31  
32 210 Necessary adjustments will follow before data collection in the rest of the country.  
33  
34  
35 211

### 36 212 *Interviewer training*

37  
38 213 Interviewers with Masters education level, or equivalent will receive training in accordance  
39  
40 214 with guidelines and recommendations given by the EuroQol Foundation, with initial training  
41  
42 215 prior to, and revised training after, the first phase of data collection [50]. Based on existing  
43  
44 216 studies and recommendations from EuroQol (Elly Stolk, personal communication), six to  
45  
46 217 twelve interviewers are required.  
47  
48  
49 218  
50  
51 219 EQ-PVT QC reports will help monitor progress and data quality [42, 43]. The reports include  
52  
53 220 assessments of protocol compliance, face validity of data collected and value distributions per  
54  
55 221 interviewer. Interviewers not meeting pre-defined standards are flagged, recommended for  
56  
57  
58  
59  
60

1  
2  
3 222 retraining and ultimately excluded. Evaluation of the data collected and interviewer  
4  
5 223 performance will be regularly discussed in face-to-face group meetings throughout data  
6  
7 224 collection. QC reports have been found to further the homogeneity of interviewer  
8  
9 225 performance and reduce protocol violations and the number of inconsistent responses[51].  
10  
11

12 226

### 14 227 *EuroQol Valuation Technology*

16 228 EQ-VT was developed to meet the challenges involved with valuation of the -5L version of  
17 229 the EQ-5D, with emphasis on improving data quality and cross-country comparability [43] .  
18  
19

20 230 The standard protocol includes digital representation of visual aids to assist the respondent  
21  
22

23 231 throughout the interview (see Figures 2 and 3 from the EQ-VT software package). The study  
24  
25

26 232 will use the portable version of the software, EQ-PVT, which for the respondent has the same  
27  
28

29 233 functionality and for the most part resembles the standard EQ-VT software package.  
30  
31

32 234

33 235 The interview starts with administration of the EQ-5D-5L questionnaire followed by  
34  
35

36 236 background questions for the respondents age, sex and experience with serious illness. Next,  
37  
38

39 237 composite time trade-off (cTTO) is administered, beginning with four practice states: a  
40  
41

42 238 wheelchair example and introduction to both the “better than dead” and “worse than dead”  
43  
44

45 239 part of the task, followed by three states described with the EQ-5D-5L descriptive system,  
46  
47

48 240 selected to reflect a mild, a moderate, and a severe health state. These exercises familiarise the  
49  
50

51 241 respondent with the cTTO, the concept of health states worse than death and the use of lead-  
52  
53

54 242 time in the cTTO for the valuation of such states.  
55  
56

57 243

58 244 Respondents are randomized to one of 10 TTO blocks of EQ-5D-5L health states, each  
59  
60

61 245 consisting of 10 health states, one of which is always the worst state (level 5 on each  
62  
63

64 246 dimension, state 55555), and one among the 5 mildest states (11112, 11121, 11211, 12111,  
65  
66

1  
2  
3 247 and 21111), for a total of 86 unique EQ-5D-5L health states for direct valuation [11]. In this  
4  
5 248 study, respondents describing their own health as having at least one problem on one  
6  
7 249 dimension will be administered their own health state as an additional 11<sup>th</sup> state during the  
8  
9 250 cTTO part of the interview, allowing for comparison of values assigned to experienced and  
10  
11 251 hypothetical health states. Respondents will be given the opportunity to review their responses  
12  
13 252 in a feedback module (see Figure 4), where individual task responses can be removed. Upon  
14  
15 253 completion of the TTO tasks, respondents are randomized to one of 28 state pair blocks for  
16  
17 254 discrete choices, each block consisting of seven state pairs. In both the TTO and DCE parts of  
18  
19 255 the interview, the order of presentation is randomized.  
20  
21  
22  
23  
24  
25

26 257 The interview ends with further background questions specific to this study relating to  
27  
28 258 variables known to be associated with valuations of health states including caregiver status,  
29  
30 259 educational level and marital status, [52-55]. The influence of such variables will be assessed  
31  
32 260 in the final value set.  
33  
34  
35  
36

### 37 261 *Analysis*

38 262  
39 263 The demographic characteristics and health status of respondents will be assessed and  
40  
41 264 compared to national data. Health state values for EQ-5D-5L will be estimated through  
42  
43 265 statistical modelling of the survey data in R. To compensate for the over-sampling of those in  
44  
45 266 less than perfect health, sampling weights will be used when estimating health state values.  
46  
47 267 Respondents will be asked if they have been admitted to hospital in the last year, and weights  
48  
49 268 will be used to reflect the number of individuals in the population admitted to hospital in the  
50  
51 269 last year. The EQ-5D protocols are not prescriptive with regard to modelling and approaches  
52  
53 270 will depend on the characteristics of the data obtained [44]. Following previous research,  
54  
55 271 different models will be assessed including the either the cTTO data, or combining the cTTO  
56  
57  
58  
59  
60

1  
2  
3 272 and DCE data in a hybrid model, and the results compared for adequacy with those for  
4  
5 273 existing national value sets [14-25]. Subgroup analysis will identify variables contributing to  
6  
7 274 health state valuation in the Norwegian population. Valuation of health states defined as  
8  
9 275 respondents “own health today” will be compared with that of values estimated for the same  
10  
11 276 health states by the general population. In addition, all experienced-based valuations by those  
12  
13 277 with serious illness and/or less than perfect health will be compared to valuations based on the  
14  
15 278 total general population sample and, given sufficient data, those without experience of serious  
16  
17 279 illness and/or with perfect health today.  
18  
19  
20  
21  
22

280

### 281 *Strengths and limitations*

282 This is the first Norwegian valuation study with cTTO and DCE undertaken on a scale large  
283 enough to meet the most recent EQ-5D protocol. The study intends to complete 1500 face-to-  
284 face computer-assisted interviews across a country with a relatively dispersed population of  
285 citizens and potentially large geographical distances between them. Data collection will take  
286 place from October to December 2019 and February to May 2020, and involves a small  
287 number of interviewers working intensively over two three-month periods.  
288

289

289 Both their duration and magnitude of the tasks involved makes the interview demanding. It is  
290 important that the data collection is cost-effective, which includes considerations of data  
291 quality, representativeness and total number of valuations. Given the strategy of sampling  
292 locations and organisations rather than individuals, the assessment of its effectiveness in terms  
293 of number and representativeness of respondents will be important following the initial data  
294 collection period. Poor recruitment and data collection in remote geographical locations will  
295 be costly. The number of respondents per location will be monitored throughout data  
296 collection. Adaptive sampling will allow for inclusion of additional locations where response  
297  
298  
299  
300

1  
2  
3 297 rates are low and quotas are not met. Additional locations will be chosen at random from the  
4  
5 298 predefined frame of possible locations within the selected geographical area.  
6  
7

8 299  
9  
10 300 Due to the need for extensive training, interview experience, and understanding of the task,  
11  
12 301 only six to twelve interviewers will be included. This will give more control over the data  
13  
14 302 collection and the quality of the data collected. However, this and potential costs saved in  
15  
16 303 terms of interviewer recruitment, training and travel costs, must be balanced against the  
17  
18 304 increased impact of any loss of interviewers through illness or resignation during the data  
19  
20 305 collection period. Norway has a harsh winter climate and interviews will take place outside  
21  
22 306 the winter months, serving to reduce the risk of travel delays and interviewer illness. NIPH  
23  
24 307 has several experienced interviewers familiar with the study who will be able to complete  
25  
26 308 training and contribute to data collection where needed.  
27  
28  
29  
30

31 309  
32  
33 310 The main justification for the strategy of sampling stratified locations and the use of quotas on  
34  
35 311 the respondent level is to ensure representativeness of the final sample according to  
36  
37 312 geographical region, age, sex and educational level. A third of the total quota will be used to  
38  
39 313 recruit those with less than perfect health, through locations such as hospitals and  
40  
41 314 rehabilitation centres. Locations will also be selected to directly seek out others who are  
42  
43 315 typically harder to reach and are less likely to participate in research studies, such as those  
44  
45 316 with reduced health or with young children. Studies have found that some attributes, such as  
46  
47 317 marital and caregiver status/having young children, may influence the respondents response to  
48  
49 318 the task, such as their willingness to trade time in the TTO task, despite showing similar  
50  
51 319 preferences for given health states when using other types of valuation tasks [52, 54]. Hence,  
52  
53 320 it is important that respondents with such attributes are included in the study and locations  
54  
55 321 such as day care facilities for young children have been selected to facilitate this. Questions  
56  
57  
58  
59  
60



1  
2  
3 322 relating to these attributes will be included in the background questions closing the interview,  
4  
5 323 and as such will allow for sub-group analysis of the effect of these attributes on the valuation  
6  
7 324 of health in the Norwegian sample.  
8  
9

10 325  
11  
12 326 The EQ-5D is widely used in Norway. A national EQ-5D-5L value set and scoring algorithm  
13  
14 327 is highly anticipated and will enhance the validity of economic evaluation in Norway. To  
15  
16 328 date, Norwegian EQ-5D users have largely relied on the EQ-5D-3L scoring algorithm from  
17  
18 329 the UK [11], with a crosswalk-based approach [56] for studies that have used the five-level  
19  
20 330 version. Crosswalk-based approaches have several limitations related to issues with data  
21  
22 331 dependency and differences in scale range, and are an interim solution pending a national 5L  
23  
24 332 value set [56-58]. The proposed study will derive a value set for the EQ-5D that builds on  
25  
26 333 important developments, including health states described within the new five-level version,  
27  
28 334 EQ-VT protocol and a sampling and recruitment strategy designed to give representativeness  
29  
30  
31 335 for Norway.  
32  
33  
34  
35  
36  
37  
38  
39

### 40 338 **Ethics and dissemination**

41  
42 339 The study was reviewed by The Regional Health Authority Research Ethics Committee and  
43  
44 340 found to be outside of the scope of the ethics committee thus not in need of ethical approval.  
45  
46 341 All study participants will give informed consent.  
47  
48  
49

50 342  
51  
52  
53 343 The final scoring algorithm will contribute to the quality and relevance of the results of EQ-  
54  
55 344 5D applications in Norway, and it is highly likely that, when available, the EQ-5D-5L with a  
56  
57 345 Norwegian scoring algorithm will be the recommended instrument of choice for future  
58  
59 346 economic evaluations undertaken in Norway by the pharmaceutical industry and other

1  
2  
3 347 important users. Application of the same instrument and scoring across the health services and  
4  
5 348 industry will further enhance decision-making relating to scarce health care resources.  
6  
7 349 Moreover, scores based on Norwegian preferences will further enhance the appropriateness of  
8  
9 the EQ-5D in clinical and health services research and quality indicators work, including the  
10  
11 the EQ-5D in clinical and health services research and quality indicators work, including the  
12  
13 351 Norwegian medical registers [12].  
14  
15 352  
16  
17 353 The study results will be published in peer-review scientific journals and presented at  
18  
19 354 appropriate forums, including national and international conferences. Condensed summaries  
20  
21 355 and presentations will be given to key stakeholders and partners in the field, including  
22  
23 356 research centres that widely use the EQ-5D in clinical, health services and health economics  
24  
25  
26 357 research in Norway.  
27  
28

### 29 358 **List of abbreviations**

|        |       |                                                         |
|--------|-------|---------------------------------------------------------|
| 31 359 | EQ-VT | EuroQol Valuation Technology                            |
| 32     |       |                                                         |
| 33     |       |                                                         |
| 34 360 | cTTO  | Composite time trade-off                                |
| 35     |       |                                                         |
| 36     |       |                                                         |
| 37 361 | DCE   | Discrete choice experiments                             |
| 38     |       |                                                         |
| 39     |       |                                                         |
| 40 362 | QALY  | Quality Adjusted Life Year                              |
| 41     |       |                                                         |
| 42     |       |                                                         |
| 43 363 | PROMs | Patient Reported Outcomes Measures                      |
| 44     |       |                                                         |
| 45     |       |                                                         |
| 46 364 | NQR   | National Quality Registries                             |
| 47     |       |                                                         |
| 48     |       |                                                         |
| 49 365 | NICE  | National Institute for Health and Care Excellence       |
| 50     |       |                                                         |
| 51     |       |                                                         |
| 52 366 | QC    | Quality control software included in the EQ-VT software |
| 53     |       |                                                         |
| 54     |       |                                                         |
| 55 367 |       |                                                         |
| 56     |       |                                                         |
| 57     |       |                                                         |
| 58 368 |       |                                                         |
| 59     |       |                                                         |
| 60     |       |                                                         |

## 369 **Declarations**

### 370 **Competing interests**

371 The authors have no competing interests.

### 372 **Availability of data and material**

373 Not applicable.

### 374 **Funding**

375 This work is supported by the Norwegian Research Council (grant number: 262673) and the  
376 EuroQol Foundation (EQ Project 20190280).

### 377 **Author contributions**

378 AMG conceived the study and secured funding. All authors participated in its design. TMH  
379 and AMG contributed to drafting and revising the manuscript. All authors have read and  
380 approved the final version.

### 381 **Patient and Public Involvement**

382 Patients and members of the public were not invited to comment on the study design. Patients  
383 and members of the public were not invited to contribute to the writing or editing of this  
384 document for readability or accuracy.

## 386 **References**

- 387 1. Hagen, G.W., T.; Klemp, M., *Helseøkonomisk evaluering ved Nasjonal kunnskapssenter for*  
388 *helsetjenesten*. Norsk Epidemiologi, 2013. **23**(2): p. 157-164.
- 389 2. *Guidelines for the submission of documentation for single technology assessment (STA) of*  
390 *pharmaceuticals*. 2018, Statens Legemiddelverk (National Medicine Agency).
- 391 3. Ottersen, T., et al., *A new proposal for priority setting in Norway: Open and fair*. Health  
392 Policy, 2016. **120**(3): p. 246-51.
- 393 4. *På ramme alvor: alvorlighet og prioritering*. 2015, Report from working group appointed by  
394 Norwegian Ministry of Health and Care Services.

- 1
- 2
- 3 395 5. *Principles for priority setting in health care— Summary of a white paper on priority setting in*
- 4 396 *the Norwegian health care sector* 2015, Norwegian Ministry of Health and Care Services.
- 5 397 6. Drummond MF, S.M., Torrance G, O'Brien B, Stoddart G. , *Methods for the economic*
- 6 398 *evaluation of health care programmes*. 3rd edition ed. 2005: Oxford University Press.
- 7 399 7. Nord, E., *EuroQol: health-related quality of life measurement. Valuations of health states by*
- 8 400 *the general public in Norway*. Health Policy, 1991. **18**(1): p. 25-36.
- 9 401 8. Garratt, A., et al., *Quality of life measurement: bibliographic study of patient assessed health*
- 10 402 *outcome measures*. BMJ, 2002. **324**(7351): p. 1417.
- 11 403 9. Nord, E., *Cost-Value Analysis in Health Care: Making Sense out of QALYS*. 1999: Cambridge
- 12 404 University Press.
- 13 405 10. Wisloff, T., et al., *Estimating QALY Gains in Applied Studies: A Review of Cost-Utility Analyses*
- 14 406 *Published in 2010*. Pharmacoeconomics, 2014. **32**(4): p. 367-375.
- 15 407 11. Dolan, P., *Modeling valuations for EuroQol health states*. Medical care, 1997. **35**(11): p. 1095-
- 16 408 108.
- 17 409 12. Group, E., *EuroQol--a new facility for the measurement of health-related quality of life*.
- 18 410 Health Policy, 1990. **16**(3): p. 199-208.
- 19 411 13. Szende A, O.M., Devlin N (Eds.) *EQ-5D Value Sets: Inventory, Comparative Review and User*
- 20 412 *Guide*. 2007, Springer: Dordrecht, The Netherlands.
- 21 413 14. Augustovski, F., et al., *An EQ-5D-5L value set based on Uruguayan population preferences*.
- 22 414 Qual Life Res, 2016. **25**(2): p. 323-33.
- 23 415 15. Devlin, N.J., et al., *Valuing health-related quality of life: An EQ-5D-5L value set for England*.
- 24 416 Health Econ, 2018. **27**(1): p. 7-22.
- 25 417 16. Hobbins, A., et al., *Utility Values for Health States in Ireland: A Value Set for the EQ-5D-5L*.
- 26 418 Pharmacoeconomics, 2018. **36**(11): p. 1345-1353.
- 27 419 17. Kim, S.H., et al., *The EQ-5D-5L valuation study in Korea*. Qual Life Res, 2016. **25**(7): p. 1845-
- 28 420 52.
- 29 421 18. Ludwig, K., J.M. Graf von der Schulenburg, and W. Greiner, *German Value Set for the EQ-5D-*
- 30 422 *5L*. Pharmacoeconomics, 2018. **36**(6): p. 663-674.
- 31 423 19. Luo, N., et al., *Estimating an EQ-5D-5L Value Set for China*. Value Health, 2017. **20**(4): p. 662-
- 32 424 669.
- 33 425 20. M, M.V., et al., *Dutch Tariff for the Five-Level Version of EQ-5D*. Value Health, 2016. **19**(4): p.
- 34 426 343-52.
- 35 427 21. Pattanaphesaj, J., et al., *The EQ-5D-5L Valuation study in Thailand*. Expert Rev Pharmacoecon
- 36 428 *Outcomes Res*, 2018. **18**(5): p. 551-558.
- 37 429 22. Purba, F.D., et al., *The Indonesian EQ-5D-5L Value Set*. Pharmacoeconomics, 2017. **35**(11): p.
- 38 430 1153-1165.
- 39 431 23. Shafie, A.A., et al., *EQ-5D-5L Valuation for the Malaysian Population*. Pharmacoeconomics,
- 40 432 2018.
- 41 433 24. Wong, E.L.Y., et al., *Assessing the Use of a Feedback Module to Model EQ-5D-5L Health States*
- 42 434 *Values in Hong Kong*. Patient, 2018. **11**(2): p. 235-247.
- 43 435 25. Xie, F., et al., *A Time Trade-off-derived Value Set of the EQ-5D-5L for Canada*. Med Care,
- 44 436 2016. **54**(1): p. 98-105.
- 45 437 26. Devlin, N.J., D. Parkin, and J. Browne, *Patient-reported outcome measures in the NHS: new*
- 46 438 *methods for analysing and reporting EQ-5D data*. Health Econ, 2010. **19**(8): p. 886-905.
- 47 439 27. Gutacker, N., et al., *Hospital variation in patient-reported outcomes at the level of EQ-5D*
- 48 440 *dimensions: evidence from England*. Med Decis Making, 2013. **33**(6): p. 804-18.
- 49 441 28. Solberg, T.K., et al., *Health-related quality of life assessment by the EuroQol-5D can provide*
- 50 442 *cost-utility data in the field of low-back surgery*. European spine journal : official publication
- 51 443 *of the European Spine Society, the European Spinal Deformity Society, and the European*
- 52 444 *Section of the Cervical Spine Research Society*, 2005. **14**(10): p. 1000-7.
- 53 445 29. Pettersen, K.I., et al., *Health-related quality of life after myocardial infarction is associated*
- 54 446 *with level of left ventricular ejection fraction*. BMC Cardiovasc Disord, 2008. **8**: p. 28.

- 1  
2  
3 447 30. Solli, O., K. Stavem, and I.S. Kristiansen, *Health-related quality of life in diabetes: The*  
4 448 *associations of complications with EQ-5D scores*. Health Qual Life Outcomes, 2010. **8**: p. 18.
- 5 449 31. Stavem, K., H. Bjornaes, and M.I. Lossius, *Properties of the 15D and EQ-5D utility measures in*  
6 450 *a community sample of people with epilepsy*. Epilepsy Res, 2001. **44**(2-3): p. 179-89.
- 7 451 32. Nilsson, E., L. Orwelius, and M. Kristenson, *Patient-reported outcomes in the Swedish*  
8 452 *National Quality Registers*. Journal of internal medicine, 2016. **279**(2): p. 141-53.
- 9 453 33. Hernández-Alava, M.P., S; Wailoo, A;, *Quality review of a proposed EQ-5D-5L value set for*  
10 454 *England*. 2018, Policy Research Unit in Economic Evaluation of Health and Care Interventions.  
11 455 Universities of Sheffield and York.: EEPUR Research Report 060.
- 12 456 34. *Position statement on use of the EQ-5D-5L valuation set for England (updated November*  
13 457 *2018)*. National Institute for Health and Care Excellence 2018 [28.05.2019]; Available from:  
14 458 [https://www.nice.org.uk/about/what-we-do/our-programmes/nice-guidance/technology-](https://www.nice.org.uk/about/what-we-do/our-programmes/nice-guidance/technology-appraisal-guidance/eq-5d-5l)  
15 459 [appraisal-guidance/eq-5d-5l](https://www.nice.org.uk/about/what-we-do/our-programmes/nice-guidance/technology-appraisal-guidance/eq-5d-5l).
- 16 460 35. Olsen, J.A., A.N. Lamu, and J. Cairns, *In search of a common currency: A comparison of seven*  
17 461 *EQ-5D-5L value sets*. Health Econ, 2018. **27**(1): p. 39-49.
- 18 462 36. Bailey, H. and P. Kind, *Preliminary findings of an investigation into the relationship between*  
19 463 *national culture and EQ-5D value sets*. Qual Life Res, 2010. **19**(8): p. 1145-54.
- 20 464 37. Brazier, J., et al., *Should patients have a greater role in valuing health states?* Appl Health  
21 465 Econ Health Policy, 2005. **4**(4): p. 201-8.
- 22 466 38. Dolan, P., *Thinking about it: thoughts about health and valuing QALYs*. Health Economics,  
23 467 2011. **20**(12): p. 1407-1416.
- 24 468 39. *Stivarga kommer inte att ingå i högkostnadsskyddet. [Stivarga will not be reimbursed]*  
25 469 T.D.a.P.B.A. (TLV). Editor. 2014, TLV: Stockholm.
- 26 470 40. De Wit, G.A., J.J.V. Busschbach, and F.T. De Charro, *Sensitivity and perspective in the*  
27 471 *valuation of health status: whose values count?* Health Economics, 2000. **9**(2): p. 109-126.
- 28 472 41. Dolan, P., *NICE should value real experiences over hypothetical opinions*. Nature, 2009.  
29 473 **462**(7269): p. 35.
- 30 474 42. Heijink, R., P. Reitmeir, and R. Leidl, *International comparison of experience-based health*  
31 475 *state values at the population level*. Health Qual Life Outcomes, 2017. **15**(1): p. 138.
- 32 476 43. Oppe, M., et al., *A program of methodological research to arrive at the new international EQ-*  
33 477 *5D-5L valuation protocol*. Value Health, 2014. **17**(4): p. 445-53.
- 34 478 44. Oppe, M., et al., *EuroQol Protocols for Time Trade-Off Valuation of Health Outcomes*.  
35 479 Pharmacoeconomics, 2016. **34**(10): p. 993-1004.
- 36 480 45. Stolk, E., et al., *Overview, Update, and Lessons Learned From the International EQ-5D-5L*  
37 481 *Valuation Work: Version 2 of the EQ-5D-5L Valuation Protocol*. Value Health, 2019. **22**(1): p.  
38 482 23-30.
- 39 483 46. Galea, S. and M. Tracy, *Participation Rates in Epidemiologic Studies*. Annals of Epidemiology,  
40 484 2007. **17**(9): p. 643-653.
- 41 485 47. *Microdata.no*. 2019 [12.03.2019]; Available from: <https://microdata.no/en/>
- 42 486 48. Singer, E.V.H., J; Gebler, N; Raghunathan, T; McGonagle, K, *The Effect of Incentives on*  
43 487 *Response Rates in Interviewer-Mediated Surveys*. Journal of Official Statistics, 1999. **Vol.**  
44 488 **15**(No. 2): p. 2017-230.
- 45 489 49. Marans, R.W., E. Ryu, and M.P. Couper, *Survey Incentives: Cash vs. In-Kind; Face-to-Face vs.*  
46 490 *Mail; Response Rate vs. Nonresponse Error*. International Journal of Public Opinion Research,  
47 491 2005. **18**(1): p. 89-106.
- 48 492 50. Purba, F.D., et al., *Employing quality control and feedback to the EQ-5D-5L valuation protocol*  
49 493 *to improve the quality of data collection*. Qual Life Res, 2017. **26**(5): p. 1197-1208.
- 50 494 51. Ramos-Goñi, J.M., et al., *Quality Control Process for EQ-5D-5L Valuation Studies*. Value in  
51 495 Health, 2017. **20**(3): p. 466-473.
- 52 496 52. van Nooten, F., et al., *What should we know about the person behind a TTO?* The European  
53 497 Journal of Health Economics, 2018. **19**(9): p. 1207-1211.

498 53. Craig, B.M., et al., *Demographic differences in health preferences in the United States*. Med  
 499 Care, 2014. **52**(4): p. 307-13.  
 500 54. van der Pol, M. and A. Shiell, *Extrinsic Goals and Time Tradeoff*. Medical Decision Making,  
 501 2007. **27**(4): p. 406-413.  
 502 55. van Nooten, F.E., et al., *"Married with children" the influence of significant others in TTO*  
 503 *exercises*. Health and Quality of Life Outcomes, 2015. **13**(1): p. 94.  
 504 56. van Hout, B., et al., *Interim scoring for the EQ-5D-5L: mapping the EQ-5D-5L to EQ-5D-3L*  
 505 *value sets*. Value Health, 2012. **15**(5): p. 708-15.  
 506 57. Kularatna, S., et al., *Mapping Sri Lankan EQ-5D-3L to EQ-5D-5L Value Sets*. Value Health Reg  
 507 Issues, 2017. **12**: p. 20-23.  
 508 58. Golicki, D., et al., *Interim EQ-5D-5L Value Set for Poland: First Crosswalk Value Set in Central*  
 509 *and Eastern Europe*. Value Health Reg Issues, 2014. **4**: p. 19-23.

510

511

512 **Tables**

513 Table 1: Locations for recruitment of participants, by age group and health status

| Healthy                    |                                           |                                     |                | Reduced health         |
|----------------------------|-------------------------------------------|-------------------------------------|----------------|------------------------|
| Young                      | Middle-aged                               | Elderly                             | All ages       | All ages               |
| Places of higher education | Workplaces                                | Eldery homes                        | Public library | Hospitals              |
| Child daycare facilities   | Recreational organisations (sports teams) | Recreational organisations (choirs) | Town hall      | Rehabilitation centres |
| Social welfare*            | Social welfare*                           | Community volunteer centres         |                |                        |
|                            | Adult education*                          |                                     |                |                        |

514 \*Locations chosen to increase participation of those with lower socio-economic status

515 Table 2: Example sampling of hospital catchment areas and quotas per catchment area

| Region        | Population in region | Catchment area | Population in catchment area | Quota per catchment area |
|---------------|----------------------|----------------|------------------------------|--------------------------|
| Northern      | 381907               | Hospital 1     | 130000                       | 140                      |
| Central       | 560690               | Hospital 2     | 60000                        | 205                      |
| Western       | 843899               | Hospital 3     | 330000                       | 309                      |
| South-Eastern | 2299890              | Hospital 4     | 500000                       | 448                      |
| South-Eastern | '                    | Hospital 5     | 160000                       | 143                      |
| South-Eastern | '                    | Hospital 6     | 280000                       | 251                      |

516

517 Table 3: Example of quotas within a sampled catchment area based on the composition of sex,  
 518 age and educational level in the general population of the respective region (source: Official  
 519 statistics for 2017 generated from microdata.no). Example given sampling scenario and  
 520 catchment area for Hospital 1 in Table 2.

| Sex                       | Highest attained educational level | Age groups |       |       |       |       |       |     | Total quota per sex and educational level |
|---------------------------|------------------------------------|------------|-------|-------|-------|-------|-------|-----|-------------------------------------------|
|                           |                                    | 18-24      | 25-34 | 35-44 | 45-54 | 55-64 | 65-74 | 75+ |                                           |
| Male                      | Primary or secondary               | 8          | 9     | 8     | 9     | 9     | 7     | 5   | 56                                        |
|                           | Tertiary                           | 1          | 3     | 3     | 3     | 3     | 2     | 1   | 16                                        |
| Female                    | Primary or secondary               | 7          | 6     | 5     | 7     | 8     | 8     | 7   | 47                                        |
|                           | Tertiary                           | 1          | 5     | 5     | 5     | 3     | 2     | 1   | 22                                        |
| Total quota per age group |                                    | 17         | 22    | 22    | 25    | 22    | 18    | 14  | 140                                       |

521

522

For peer review only

1  
2  
3  
4  
5  
6  
7  
8  
9  
10  
11  
12  
13  
14  
15  
16  
17  
18  
19  
20  
21  
22  
23  
24  
25  
26  
27  
28  
29  
30  
31  
32  
33  
34  
35  
36  
37  
38  
39  
40  
41  
42  
43  
44  
45  
46  
47  
48  
49  
50  
51  
52  
53  
54  
55  
56  
57  
58  
59  
60

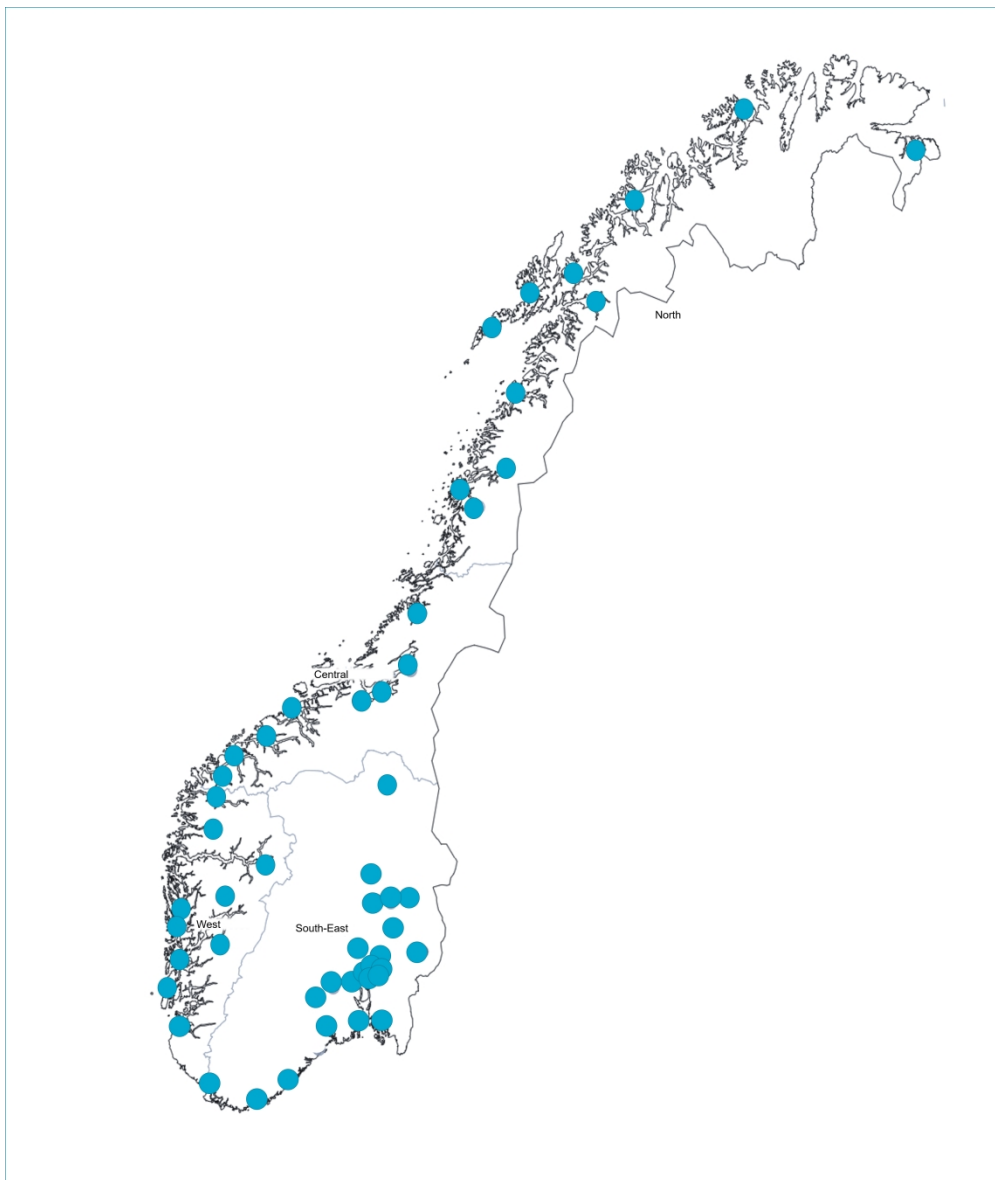

Figure 1: Hospitals with Acute Care Function in Norway



1  
2  
3  
4  
5  
6  
7  
8  
9  
10  
11  
12  
13  
14  
15  
16  
17  
18  
19  
20  
21  
22  
23  
24  
25  
26  
27  
28  
29  
30  
31  
32  
33  
34  
35  
36  
37  
38  
39  
40  
41  
42  
43  
44  
45  
46  
47  
48  
49  
50  
51  
52  
53  
54  
55  
56  
57  
58  
59  
60

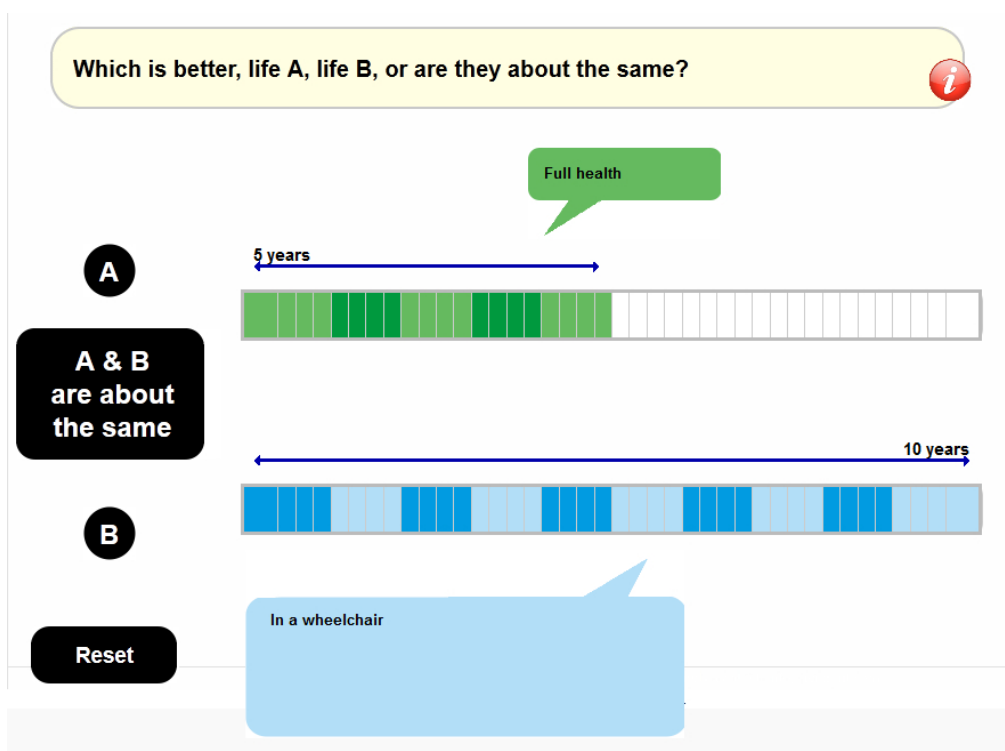

Figure 2: Screenshot of visual aid for cTTO task in EQ-VT (source: EuroQol Foundation)

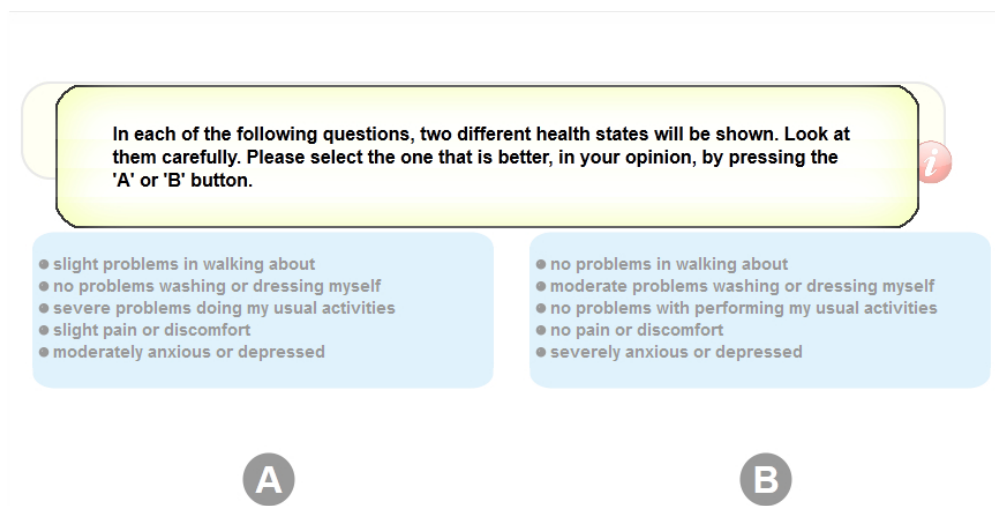

Figure 3: Screenshot of visual aid for DCE task in EQ-VT (source: EuroQoI Foundation)

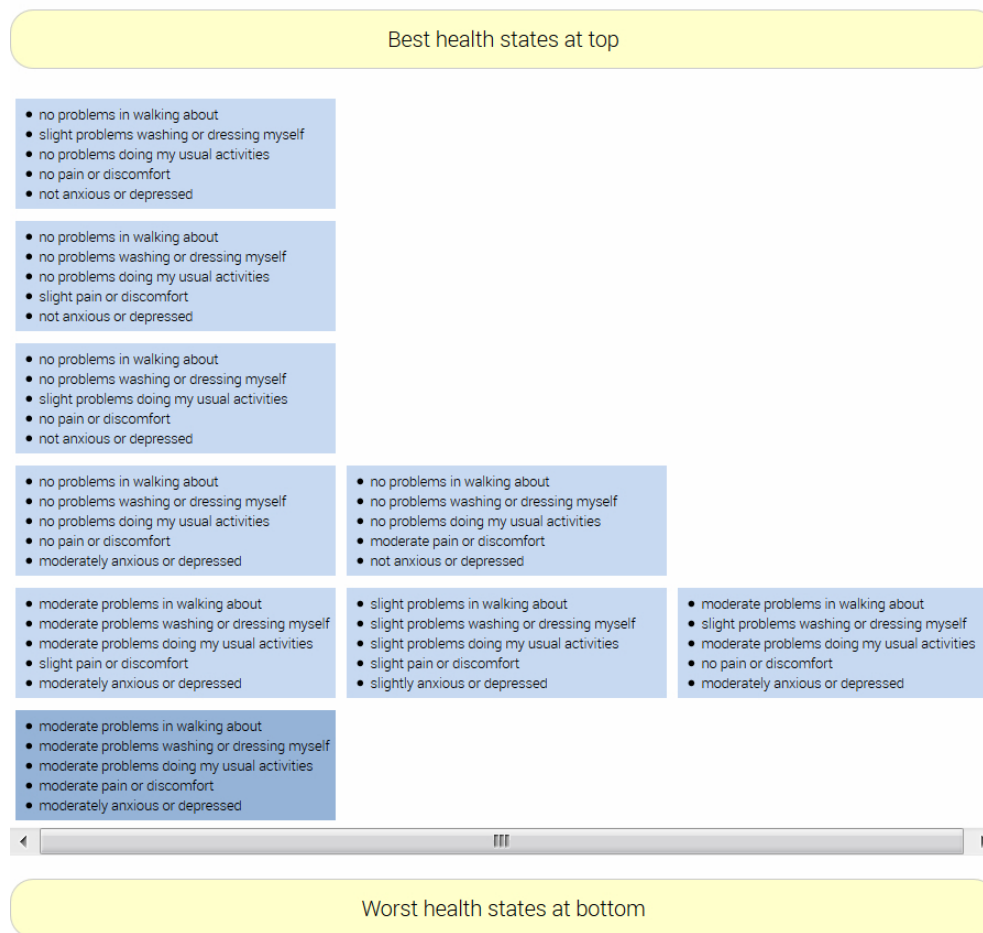

Figure 4: Screenshot of the feedback module in EQ-VT (source: EuroQol Foundation)

# BMJ Open

## Elicitation of Norwegian EQ-5D-5L Values for Hypothetical and Experience-based Health States Based on the EuroQol Valuation Technology (EQ-VT) Protocol

|                                 |                                                                                                                                                                                                                                                                                                                                                                                                                                                                                                                                                   |
|---------------------------------|---------------------------------------------------------------------------------------------------------------------------------------------------------------------------------------------------------------------------------------------------------------------------------------------------------------------------------------------------------------------------------------------------------------------------------------------------------------------------------------------------------------------------------------------------|
| Journal:                        | <i>BMJ Open</i>                                                                                                                                                                                                                                                                                                                                                                                                                                                                                                                                   |
| Manuscript ID                   | bmjopen-2019-034683.R1                                                                                                                                                                                                                                                                                                                                                                                                                                                                                                                            |
| Article Type:                   | Protocol                                                                                                                                                                                                                                                                                                                                                                                                                                                                                                                                          |
| Date Submitted by the Author:   | 16-Mar-2020                                                                                                                                                                                                                                                                                                                                                                                                                                                                                                                                       |
| Complete List of Authors:       | Hansen, Tonya; Norwegian Institute of Public Health, Health Services Research<br>Helland, Ylva; Norwegian Institute of Public Health, Health Services Research<br>Augestad, Liv ; University of Oslo Faculty of Medicine, Health Management and Health Economics<br>Rand, Kim; Akershus University Hospital, Health Services Research Unit<br>Stavem, K; University of Oslo, Institute of Clinical Medicine; Akershus University Hospital, Pulmonary Medicine<br>Garratt, Andrew ; Norwegian Institute of Public Health, Health Services Research |
| <b>Primary Subject Heading</b>: | Health economics                                                                                                                                                                                                                                                                                                                                                                                                                                                                                                                                  |
| Secondary Subject Heading:      | Research methods, Health services research                                                                                                                                                                                                                                                                                                                                                                                                                                                                                                        |
| Keywords:                       | Health economics < HEALTH SERVICES ADMINISTRATION & MANAGEMENT, HEALTH ECONOMICS, Health policy < HEALTH SERVICES ADMINISTRATION & MANAGEMENT                                                                                                                                                                                                                                                                                                                                                                                                     |
|                                 |                                                                                                                                                                                                                                                                                                                                                                                                                                                                                                                                                   |

SCHOLARONE™  
Manuscripts



I, the Submitting Author has the right to grant and does grant on behalf of all authors of the Work (as defined in the below author licence), an exclusive licence and/or a non-exclusive licence for contributions from authors who are: i) UK Crown employees; ii) where BMJ has agreed a CC-BY licence shall apply, and/or iii) in accordance with the terms applicable for US Federal Government officers or employees acting as part of their official duties; on a worldwide, perpetual, irrevocable, royalty-free basis to BMJ Publishing Group Ltd ("BMJ") its licensees and where the relevant Journal is co-owned by BMJ to the co-owners of the Journal, to publish the Work in this journal and any other BMJ products and to exploit all rights, as set out in our [licence](#).

The Submitting Author accepts and understands that any supply made under these terms is made by BMJ to the Submitting Author unless you are acting as an employee on behalf of your employer or a postgraduate student of an affiliated institution which is paying any applicable article publishing charge ("APC") for Open Access articles. Where the Submitting Author wishes to make the Work available on an Open Access basis (and intends to pay the relevant APC), the terms of reuse of such Open Access shall be governed by a Creative Commons licence – details of these licences and which [Creative Commons](#) licence will apply to this Work are set out in our licence referred to above.

Other than as permitted in any relevant BMJ Author's Self Archiving Policies, I confirm this Work has not been accepted for publication elsewhere, is not being considered for publication elsewhere and does not duplicate material already published. I confirm all authors consent to publication of this Work and authorise the granting of this licence.

1  
2  
3 **1 Elicitation of Norwegian EQ-5D-5L Values for Hypothetical and Experience-based**  
4  
5 **2 Health States Based on the EuroQol Valuation Technology (EQ-VT) Protocol**  
6  
7  
8  
9

10 4 Tonya Moen Hansen, MSc<sup>1</sup> tonyamoen.hansen@fhi.no  
11  
12 5 Ylva Helland, PhD<sup>1</sup> ylva.helland@fhi.no  
13  
14 6 Liv Ariane Augestad, PhD<sup>2</sup> l.a.augestad@medisin.uio.no  
15  
16 7 Kim Rand, PhD<sup>3</sup> kim.rand@ahus.no  
17  
18 8 Knut Stavem, MD, MPH, PhD<sup>3-5</sup> knut.stavem@medisin.uio.no  
19  
20 9 Andrew Garratt, PhD<sup>1</sup> andrew.garratt@fhi.no  
21  
22  
23  
24

25 11 <sup>1</sup>Division for Health Services, Norwegian Institute of Public Health, Oslo, Norway

26  
27 12 <sup>2</sup>Department of Health Management and Health Economics, Medical Faculty, University of Oslo,  
28  
29 13 Oslo, Norway

30  
31 14 <sup>3</sup>Health Services Research Unit, Akershus University Hospital, Norway

32  
33 15 <sup>4</sup>Institute of Clinical Medicine, University of Oslo, Norway

34  
35 16 <sup>5</sup>Department of Pulmonary Medicine, Medical Division, Akershus University Hospital, Norway  
36  
37  
38

39 18 Corresponding author:

40  
41 19 Tonya Moen Hansen  
42  
43  
44  
45

46 21 Word count: 3872  
47  
48  
49

50  
51 **23 Abstract**

52  
53 24 **Introduction** Norway is one of several European countries that lacks a national value set and  
54  
55 25 scoring algorithm for the EQ-5D. Recent studies have found differences between countries in  
56  
57 26 terms of health values or preferences for health states described by instruments such as the  
58  
59 27 EQ-5D. The project aims to model a national value set for the five level version of the EQ-5D

1  
2  
3 28 (EQ-5D-5L) based on values elicited from a representative sample of the Norwegian adult  
4  
5 29 general population in terms of region, age, sex, and level of education. Using a sampling  
6  
7 30 strategy supporting the collection of values for both hypothetical and experienced health  
8  
9 31 states, the study will have the additional aim of assessing the feasibility of collecting  
10  
11 32 experience-based values in accordance with the latest EQ-5D valuation study protocol, and  
12  
13 33 comparing values with those given for hypothetical health states.  
14  
15  
16  
17

18 34 **Methods and analysis** Multi-stage random sampling and quota-sampling will contribute to  
19  
20 35 representativeness. To increase the number of valuations of experienced health states, those  
21  
22 36 with less than perfect health will be over-sampled, increasing the total number of interviews  
23  
24 37 from 1000 to 1300–1500. The most recent EQ-5D valuation protocol will be followed which  
25  
26 38 includes computer assisted face-to-face, one-to-one interviews and use of composite time  
27  
28 39 trade-off (cTTO) and discrete choice experiments (DCE).  
29  
30  
31  
32

33 40 **Ethics and dissemination** The study has been reviewed and found to be outside of the scope  
34  
35 41 of the ethics committee and thus not in need of ethical approval. The study findings study will  
36  
37 42 be disseminated through peer-reviewed publications, conference presentations, and  
38  
39 43 summaries for key stakeholders and partners in the field. The scoring algorithms will be  
40  
41 44 available for widely used statistical software.  
42  
43  
44  
45

46 45 **Keywords:** Utilities, Health state valuation, EQ-5D, Time trade-off, QALY  
47  
48

## 49 46 **Article summary**

### 50 47 **Strengths and limitations of this study**

- 51 48 • This is the first Norwegian valuation study with cTTO (composite time trade-off) and  
52 49 DCE (discrete choice experiment) undertaken on a scale large enough to meet the  
53 50 recommendations of the most recent EQ-5D protocol.  
54  
55  
56  
57  
58  
59  
60

- 51 • Sampling strategy designed to both ensure representativeness of the final sample  
52 according to geographical region, age, sex and educational level and increase the  
53 number of experience-based valuations.
- 54 • Data collection restricted to EuroQol protocol, primarily developed for hypothetical  
55 health state valuation, but with the additional aim of collecting experience-based  
56 valuations. Study design does not allow for the assessment of methods other than  
57 those described in the EQ-VT protocol.
- 58 • Restricted samples for comparisons of experience-based valuations.
- 59 • High respondent burden experienced in interviews limits the scope for addressing  
60 additional methodological questions.

## 62 **Introduction**

63 Economic evaluation undertaken by the Norwegian Institute of Public Health and the  
64 Norwegian Medicine Agency increasingly informs decisions about the introduction of new  
65 drugs and other health technologies in Norway [1, 2]. The Norheim Committee [3] and  
66 Magnussen Working Group [4] proposed methods to enhance the quality of economic  
67 evaluation, thereby further strengthening the role of economic evaluation in decision-making.  
68 The Ministry of Health followed up these proposals in a 2016 White Paper to Parliament on  
69 principles for priority setting in health care [5].

70  
71 Given the important role and impact of economic evaluation, it is important that the methods  
72 it incorporates, including cost-utility analysis, are consistent with societal values regarding  
73 publicly financed health care. Economic evaluation, when taking into account societal values,  
74 often takes the form of cost-utility analyses with the estimation of the incremental cost per  
75 Quality Adjusted Life Year (QALY) gained [6]. QALY takes the integral of health-related



1  
2  
3 76 quality of life (HRQoL) over time, with HRQoL represented on a scale where 1 indicates a  
4  
5 77 preference equal to that for full health and 0 implies a health state equal to that of being dead.  
6  
7 78 Values are typically derived using general population surveys where respondents consider the  
8  
9  
10 79 relative undesirability of different health states described using instruments such as the EQ-  
11  
12 80 5D [7]. After assigning values to health states described by an instrument, QALYs are  
13  
14 81 calculated by multiplying the health state value by the length of time spent in each. Evaluation  
15  
16 82 of alternative technologies then involves comparison of incremental QALYs gained over  
17  
18 83 incremental costs for new vs. existing technologies.  
19  
20  
21  
22 84

23  
24 85 Several instruments are available to calculate QALYs, of which the EQ-5D is by far the most  
25  
26 86 widely applied both internationally and in Norway [8-10]. The EQ-5D™, a trade mark of the  
27  
28 87 EuroQol Research Foundation, is available in over 150 languages [11] in the self-complete  
29  
30 88 paper version [12], and national value sets and normative data exist for over 20 countries [7,  
31  
32 89 13-25]. It is brief, widely tested, and includes five important aspects of health (mobility, self-  
33  
34 90 care, usual activities, pain/discomfort and anxiety/depression), with the most recent version  
35  
36 91 having five levels (5L) from no problems to severe problems. The EQ-5D is considered  
37  
38 92 highly acceptable to most patient groups and feasible for application where a short-form  
39  
40 93 general measure of health is required. The instrument has had widespread application in  
41  
42 94 research including clinical trials, population health surveys, in both Norwegian [26] and  
43  
44 95 Swedish National Quality Registries (NQR) [27], and more recently as a health care quality  
45  
46 96 indicator as part of the National Health Service for England and Wales Patient Reported  
47  
48 97 Outcomes Measures (PROMs) programme [14].  
49  
50  
51  
52  
53  
54 98

55  
56 99 The Norwegian Medicines Agency recommends the use of EQ-5D in all technology  
57  
58 100 assessments and the use of a 5L tariff for studies where the 5L version has been used [2]. In  
59  
60

1  
2  
3 101 the absence of a Norwegian tariff, the 2018 Agency guidelines currently recommend the use  
4  
5 102 of the EQ-5D-5L tariff for England [14] where EQ-5D-5L has been used. However, criticism  
6  
7 103 has been levelled at the English tariff including concerns with data quality in which serious  
8  
9 104 deficiencies were revealed [28]. The English 5L tariff followed an early protocol, which has  
10  
11 105 since been updated with the aim of improving data quality and interview techniques.  
12  
13 106 Following these concerns, and in contrast to recommendations of the Norwegian Medicines  
14  
15 107 Agency, NICE continues to recommend the use of the 3L tariff over the 5L tariff, with 5L  
16  
17 108 values mapped onto 3L where appropriate [29].  
18  
19  
20  
21  
22

23  
24 110 The EQ-5D is widely used in Norway, including the national quality registers where it is the  
25  
26 111 most widely used patient-reported outcome measure. A national EQ-5D-5L value set and  
27  
28 112 scoring algorithm is highly anticipated and will enhance the validity of economic evaluation  
29  
30 113 in Norway. Norwegian EQ-5D users have largely relied on the EQ-5D-3L scoring algorithm  
31  
32 114 from the UK [30], with a crosswalk-based approach [31] for studies that have used the 5L  
33  
34 115 version. Crosswalk-based approaches have several limitations related to issues with data  
35  
36 116 dependency and differences in scale range, and are an interim solution pending a national 5L  
37  
38 117 value set [31-33]. Cross-national comparisons of national EQ-5D-5L value sets also suggest  
39  
40 118 that there might be substantial differences across countries [13, 34] with culture and values  
41  
42 119 having a role [35]. Values for health for the 5L version of the EQ-5D, that are representative  
43  
44 120 for the Norwegian general population, will enhance the validity and legitimacy of economic  
45  
46 121 evaluation in Norway.  
47  
48  
49  
50

51 122  
52  
53 123 With few exceptions [36-38], existing EQ-5D value sets are based on the general population  
54  
55 124 valuing hypothetical health states, which follows recommendations that economic evaluation  
56  
57 125 should include societal preferences [39]. In recent years there has been some criticism  
58  
59  
60

1  
2  
3 126 levelled at this approach, questioning the validity of health state valuations from a general  
4  
5 127 population lacking the adequate experience or knowledge of the health states, which they  
6  
7  
8 128 value in the form of hypothetical health states [40, 41]. An alternative approach, as  
9  
10 129 recommended by Sweden's Dental and Pharmaceutical Benefits Agency [42], involves  
11  
12 130 individuals valuing their own health state to give experience-based values or basing their  
13  
14 131 valuations on other forms of experience. The debate on whether to use hypothetical or  
15  
16  
17 132 experience-based values is to a certain extent a normative issue, relating to what we aim to  
18  
19 133 maximize [43]. However, there are a number of empirical questions pertaining to experience-  
20  
21 134 based values. Arguably, patients have a better understanding of the consequences of reduced  
22  
23 135 health on quality of life [41, 44-46]. On the other hand, they may have trouble imagining life  
24  
25 136 in full health, may underreport impact of disease due to adaptation or changes in expectations  
26  
27  
28 137 over time [44, 47], or may be less inclined to value their current health state as a state that is  
29  
30 138 worse than being dead. Experience-based valuations, if better understood and elicited from  
31  
32  
33 139 representative samples of the general population may however be suitable for inclusion as  
34  
35 140 societal values. The feasibility of collecting experience-based values, the assessment of how  
36  
37 141 those with less than perfect health value their current health state and other health states in  
38  
39  
40 142 general, and how different forms of experience may influence health state valuations, are new  
41  
42 143 areas for research to which this study will contribute [48].  
43  
44  
45 144

46  
47 145 The project will derive a Norwegian EQ-5D-5L value set representative of region, age, sex  
48  
49 146 and level of education composition in the Norwegian adult general population. Furthermore,  
50  
51 147 the study will allow for comparisons of experience-based and hypothetical health state  
52  
53 148 valuation.  
54  
55

56 149  
57  
58  
59  
60

## 150 **Methods and analysis**

151 Values for EQ-5D-5L health states will be obtained by electronic data collection including  
152 computer assisted face-to-face, one-to-one interviews and the use of composite time trade-off  
153 (cTTO) and discrete choice experiments (DCE) [49, 50]. The latest EQ-5D-5L protocol will  
154 be followed including EuroQol Valuation Technology (EQ-VT).

### 156 *Sampling*

157 Respondents must be aged 18 years or older, resident in Norway and proficient in Norwegian.  
158 Following EQ-VT (EuroQol Valuation Technology) protocol, sample size is set to a minimum  
159 of 1000 individuals with each valuing 10 health states, which gives the recommended 10,000  
160 responses [50]. Additional 300-500 interviews, based on the oversampling of those with less  
161 than perfect health, will increase the number of valuations of experienced health states.

162  
163 Norway is a Northern European country with a population of slightly more than 5 million, and  
164 a universal health care system. The population covers a comparatively large land mass, and  
165 for many there may be several hours travel time to the nearest hospital or large city.  
166 Urbanisation has further contributed to variation in demographic characteristics at the regional  
167 level. These factors combined with local culture, politics and traditions mean that  
168 geographical considerations are important to the design of the study.

169  
170 The study will use a combination of multistage random sampling and quota sampling ensuring  
171 representativeness according to geography, age, sex and educational level. The first stage of  
172 sampling will be of geographical areas, here defined as municipalities within each acute care  
173 hospital catchment area. Norway's four regional health authorities include Northern, Central,  
174 Western and South-Eastern, with more than half the population residing in the South-Eastern

1  
2  
3 175 health region. The catchment areas served by the 54 acute care hospitals cover all Norwegian  
4  
5 176 residents (see Figure 1). They vary considerably in the number of residents that they serve,  
6  
7 177 from 15,000 up to 500,000 residents. One acute care hospital will be randomly selected from  
8  
9 178 each health region with the exception of the South-Eastern region, where three will be  
10  
11 179 randomly selected to account for the disproportionate number of people residing in this  
12  
13 180 region. Hospital catchment areas within each region will be sampled with proportional  
14  
15 181 allocation, ensuring equal probability proportionate to the number of people residing in each  
16  
17 182 area within the region.  
18  
19  
20  
21  
22

23  
24 184 Within each sampled geographical area, the possible locations for data collection will  
25  
26 185 constitute the sample frame for the second stage of sampling (Table 1). Locations will include  
27  
28 186 public places (e.g. public libraries, town halls), workplaces, recreational organisations (e.g.  
29  
30 187 sports clubs), and healthcare providers (e.g. hospitals, rehabilitation institutions). The bodies  
31  
32 188 concerned must be willing to grant the study permission for data collection and cooperate  
33  
34 189 with provision of a suitable space for completion of the interviews. The locations will act as  
35  
36 190 clusters of possible respondents, stratified into groups based on the characteristics of target  
37  
38 191 respondents, e.g. age and educational level. Stratification will increase homogeneity per  
39  
40 192 cluster and ensure the representation of specific groups less likely to participate including  
41  
42 193 those with poorer health, lower socio-economic status, or faced with time constraints,  
43  
44 194 including those with young children or in full-time employment [51]. Locations within each  
45  
46 195 group in the sample frame will be randomly selected. The number of locations selected within  
47  
48 196 each sample frame will be based on the size of the area and quotas. Response rates,  
49  
50 197 recruitment and data quality will be assessed for the different location strata and compared  
51  
52 198 across catchment areas.  
53  
54  
55  
56  
57

58 199  
59  
60

1  
2  
3 200 Within each catchment area and at the respondent level, quota sampling will be applied  
4  
5 201 according to age, sex and level of education (see Table 2 and 3). The total quota will first be  
6  
7 202 allocated to each region proportionate to the number of people residing in each region. For the  
8  
9 203 three regions with one sampled hospital catchment area, the quota for each of these hospital  
10  
11 204 catchment areas will correspond to the regional quota. In the South-Eastern region, the  
12  
13 205 regional quota is further allocated to each hospital catchment area proportionate to the number  
14  
15 206 of people residing in each of these areas. The quota is then allocated to groups according to  
16  
17 207 gender, age group (young adults: age 18-34, middle-aged adults: age 35-64, elderly: age 65+)  
18  
19 208 and level of education (lower education, no higher than high school education, higher  
20  
21 209 education - bachelor, masters or PhD) equivalent to the distribution of these attributes in the  
22  
23 210 respective regions. The quotas for each group are calculated using data available from  
24  
25 211 <http://microdata.no> (see Table 4), a national platform in Norway giving researchers direct  
26  
27 212 access to national registries for which Statistics Norway has processing authority, such as the  
28  
29 213 Norwegian National Registry, National Education Database, labour market data, register for  
30  
31 214 Personal Tax Payers and FD-Trygd (event history database) [52].  
32  
33  
34  
35  
36  
37  
38  
39

40 216 The study will largely rely on recruitment of potential participants by contact persons at each  
41  
42 217 sampled location. Contact persons will assist in identifying and recruiting potential  
43  
44 218 respondents to the study. Prior to data collection, contact persons will receive information and  
45  
46 219 materials for publication in local newspapers and social media designed to enhance  
47  
48 220 participation. In addition to the recruitment of respondents through locations, potential  
49  
50 221 respondents will be able to contact the project group for more information about the study and  
51  
52 222 enquire about participation. Potential respondents will be informed of a gift incentive. Cash  
53  
54 223 has been found to be more effective than other incentives for increasing response rates and  
55  
56 224 following the interview, respondents will receive a cash card equivalent to 30 Euros.  
57  
58  
59  
60

1  
2  
3 225  
4  
5 226 Data collection will take place from November 2019 to June 2020. Depending on the final  
6  
7  
8 227 sampling, and with an estimate of a minimum of four interviews per interviewer per day, a  
9  
10 228 minimum of 55-80 working days are required for data collection. The recruitment strategy  
11  
12 229 will be piloted in the catchment area sampled closest to Oslo. Necessary adjustments will  
13  
14 230 follow before data collection proceeds in the rest of the country.  
15  
16

17 231

### 19 232 *Interviewer training*

21 233 Interviewers with Masters education level or equivalent will receive training in accordance  
22  
23 234 with EuroQol Foundation guidelines and recommendations, with initial training prior to, and  
24  
25 235 revised training after, the first phase of data collection [53]. Based on existing studies and  
26  
27 236 recommendations from EuroQol (Elly Stolk, personal communication), eight to twelve  
28  
29 237 interviewers are required.  
30  
31

32 238

35 239 Quality control (QC) reports will help monitor progress and data quality throughout [54, 55].  
36  
37 240 The reports will include assessments of protocol compliance, face validity of data collected  
38  
39 241 and value distributions per interviewer. QC reports have been found to further the  
40  
41 242 homogeneity of interviewer performance and reduce protocol violations and the number of  
42  
43 243 inconsistent responses [54]. Interviewers not meeting pre-defined standards will be flagged,  
44  
45 244 recommended for retraining and ultimately excluded. Evaluation of the data collected and  
46  
47 245 interviewer performance will be regularly discussed with interviewers in face-to-face group  
48  
49 246 meetings throughout data collection, and with EuroQol contact persons.  
50  
51

52 247

### 56 248 *EuroQol Valuation Technology*

1  
2  
3 249 EQ-VT was developed to meet the challenges involved with valuation of the 5L version of the  
4  
5 250 EQ-5D, with emphasis on improving data quality and cross-country comparability [49]. The  
6  
7 251 standard protocol includes digital representation of visual aids to assist the respondent  
8  
9 252 throughout the interview (see Figures 2 and 3). The study will use the portable version of the  
10  
11 253 software, EQ-PVT, which for the respondent has the same functionality and for the most part  
12  
13 254 resembles the standard EQ-VT software package.  
14  
15  
16  
17 255

18  
19 256 The interview will start with administration of the EQ-5D-5L questionnaire, including the  
20  
21 257 visual analogue scale (VAS), followed by background questions for age, sex and experience  
22  
23 258 with serious illness. Next, composite time trade-off (cTTO) is administered, beginning with  
24  
25 259 an explanation of the task demonstrated with “the wheelchair example” including the “worse  
26  
27 260 than dead” part of the task. This is followed by practice tasks for three states described with  
28  
29 261 the EQ-5D-5L descriptive system, selected to reflect a mild, moderate, and severe health state,  
30  
31 262 to familiarise the respondent further with the cTTO, the concept of health states worse than  
32  
33 263 being dead and the use of lead-time in the cTTO for the valuation of such states. Lastly,  
34  
35 264 respondents are administered their current health state as a cTTO task, allowing for the  
36  
37 265 comparison of how respondents value their own health state with both cTTO and VAS.  
38  
39  
40  
41  
42 266

43  
44 267 Respondents are randomized to one of 10 TTO blocks of EQ-5D-5L health states, each  
45  
46 268 consisting of 10 health states, one of which is always the worst state (level 5 on each  
47  
48 269 dimension, state 55555), and one among the 5 mildest states (11112, 11121, 11211, 12111,  
49  
50 270 and 21111), for a total of 86 unique EQ-5D-5L health states for direct valuation [49].  
51  
52

53 271 Respondents get the opportunity to review their responses in a feedback module (see Figure  
54  
55 272 4), where individual task responses can be removed. Upon completion of the TTO tasks,  
56  
57 273 respondents are randomized to one of 28 state pair blocks for discrete choices, each block  
58  
59  
60



1  
2  
3 274 consisting of seven state pairs. In both the TTO and DCE parts of the interview, the order of  
4  
5 275 presentation is randomized. The randomized TTO and DCE tasks do not explicitly include a  
6  
7 276 valuation of the respondents own health state, however respondents can by chance be  
8  
9  
10 277 presented their own health state as a choice, in which case the task will be completed as  
11  
12 278 normal.

13  
14 279  
15  
16  
17 280 The interview ends with further background questions specific to this study relating to  
18  
19 281 variables known to be associated with valuations of health states including caregiver status,  
20  
21 282 educational level and marital status, [56-59]. The influence of such variables will be assessed  
22  
23 283 for the final value set.

24  
25  
26 284

### 27 28 285 *Analysis*

29  
30 286 The demographic characteristics and health status, i.e. EQ-5D-5L profile, of respondents will  
31  
32 287 be assessed and compared to national data. Parallel to this study, the Norwegian Institute of  
33  
34 288 Public Health (NIPH) has initiated data collection for a postal survey assessing the health  
35  
36 289 status of the Norwegian population using the EQ-5D-5L, allowing for comparison of the  
37  
38 290 health status of study populations. Health state values for EQ-5D-5L will be estimated  
39  
40 291 through statistical modelling of the survey data. The EQ-5D protocols are not prescriptive  
41  
42 292 with regard to modelling and approaches will depend on the characteristics of the data  
43  
44 293 obtained [50]. Following previous research, different models will be assessed including either  
45  
46 294 the cTTO data, or combining the cTTO and DCE data in a hybrid model, and the results  
47  
48 295 compared for adequacy with those for existing national value sets [14-25]. Modelling of  
49  
50 296 values for the national value set will exclude valuations from respondents recruited from  
51  
52 297 locations specifically for the collection of experience-based values and the valuations of  
53  
54 298 respondents' own health state. Subgroup analysis will identify variables contributing to health  
55  
56  
57  
58  
59  
60

1  
2  
3 299 state valuation in the Norwegian population. Values for health states defined as respondents'  
4  
5 300 "own health today" will be compared with values estimated for the same health states by the  
6  
7 301 general population. In addition, all experienced-based valuations by those with serious illness  
8  
9 302 and/or less than perfect health will be compared to valuations based on the total general  
10  
11 303 population sample and, given sufficient data, those without experience of serious illness  
12  
13 304 and/or with perfect health today. To assess experience-based valuations, and explore both the  
14  
15 305 wider and more narrow concepts of experience-based valuations [48], three potential profiles  
16  
17 306 will be assessed; 1) respondents' valuation of own health state, 2) valuations given by  
18  
19 307 respondents recruited from locations specifically chosen to target those with poorer health, i.e.  
20  
21 308 health services, 3) valuations given by respondents who have indicated that they have  
22  
23 309 experience with serious illness.  
24  
25  
26  
27  
28  
29

310

### 311 *Patient and Public Involvement*

312 Patients and members of the public were not invited to comment on the study design or  
33  
34  
35 313 contribute to the writing or editing of this document for readability or accuracy.  
36  
37  
38  
39

314

315

### 316 *Strengths and limitations*

317 This is the first Norwegian valuation study with both cTTO and DCE undertaken on a scale  
32  
33  
34  
35  
36  
37  
38  
39  
40  
41  
42  
43  
44  
45  
46  
47 318 large enough to meet the most recent EQ-5D protocol. The study intends to complete 1300-  
48  
49  
50 319 1500 face-to-face computer-assisted interviews across a country with a relatively dispersed  
51  
52 320 population of citizens and large geographical distances between them. Data collection  
53  
54 321 involves a small number of interviewers working over an eight-month period.  
55  
56  
57  
58  
59  
60

322

1  
2  
3 323 Both the duration and magnitude of the tasks involved make the interview demanding. It is  
4  
5 324 important that data collection is cost-effective, which includes considerations of data quality,  
6  
7 325 representativeness and total number of valuations. Given the strategy of sampling locations  
8  
9 326 and organisations rather than individuals, the assessment of its effectiveness in terms of  
10  
11 327 number and representativeness of respondents will be important following the initial data  
12  
13 328 collection period. Poor recruitment and data collection in remote geographical locations will  
14  
15 329 be costly. The number and characteristics of respondents per location will be monitored  
16  
17 330 throughout data collection. Adaptive sampling will allow for inclusion of additional locations  
18  
19 331 where response rates are low and quotas are not met. Additional locations will be chosen at  
20  
21 332 random from the predefined frame of possible locations within the selected geographical area.  
22  
23 333  
24  
25 334 Due to the need for extensive training, interview experience, and understanding of the task,  
26  
27 335 only eight to twelve interviewers will be included. This will give more control over the data  
28  
29 336 collection and the quality of the data collected. However, this and potential costs saved in  
30  
31 337 terms of interviewer recruitment, training and travel costs, must be balanced against the  
32  
33 338 increased impact of any loss of interviewers through illness or resignation during data  
34  
35 339 collection. Norway has a harsh winter climate and apart from the Southern and Eastern  
36  
37 340 region, where the interviewers are based, the interviews will primarily take place outside the  
38  
39 341 winter months to reduce the risk of travel delays and interviewer illness. The NIPH, which is  
40  
41 342 conducting the research, has several experienced interviewers familiar with the study who will  
42  
43 343 be able to complete training and contribute to data collection if needed.  
44  
45 344  
46  
47  
48  
49  
50  
51  
52  
53  
54 345 The main justification for the strategy of sampling stratified locations and the use of quotas on  
55  
56 346 the respondent level is to ensure representativeness of the final sample according to  
57  
58 347 geographical region, age, sex and educational level. An additional quota will be used to  
59  
60

1  
2  
3 348 recruit those with less than perfect health, through locations such as hospitals and  
4  
5 349 rehabilitation centres. Locations will also be selected to directly seek out others who are  
6  
7  
8 350 typically harder to reach and are less likely to participate in research studies, such as those  
9  
10 351 with different ethnic backgrounds or with young children. Studies have found that some  
11  
12 352 attributes, such as marital and caregiver status/having young children, may influence the  
13  
14 353 respondents response to the task, such as their willingness to trade time in the TTO task,  
15  
16 354 despite showing similar preferences for given health states when using other types of  
17  
18 355 valuation tasks [56, 58]. Hence, it is important that respondents with such attributes are  
19  
20 356 included in the study and locations such as day care facilities for young children and primary  
21  
22 357 schools will be selected to facilitate this. Questions relating to these attributes will be included  
23  
24 358 in the background questions closing the interview, and as such will allow for sub-group  
25  
26 359 analysis of the effect of these attributes on the valuation of health in the Norwegian sample.  
27  
28  
29  
30  
31

32  
33 361 The derivation of values based on experienced health states is a recent development in the  
34  
35 362 field of health state valuation [48]. In recent years, there have been major developments in the  
36  
37 363 field of standardised protocols for health state valuation, including EuroQol EQ-VT. Such  
38  
39 364 standardisation is a long way off for experienced health state valuation and, as was the case  
40  
41 365 for hypothetical health state valuation up until the last decade, there is considerable variation  
42  
43 366 in the choice of methods [60]. In Norway and other countries, the feasibility of collecting such  
44  
45 367 data is still in its infancy, including choice of sampling strategies, recruitment and how to  
46  
47 368 minimise respondent burden. This study builds on existing methodology in the form of EQ-  
48  
49 369 VT protocol, to assess the feasibility of recruiting potential respondents (including from  
50  
51 370 health care settings) for experience-based health state valuation, respondent burden in the  
52  
53 371 form of completed interviews and data quality. The study design is constrained by the EQ-VT  
54  
55 372 protocol, but the results of the study will inform the development of more appropriate  
56  
57  
58  
59  
60

1  
2  
3 373 methodology in the future. Furthermore, the design will allow the comparison of results with  
4  
5 374 those for hypothetical health state valuation.  
6  
7  
8 375  
9  
10 376  
11  
12 377  
13

## 14 378 **Ethics and dissemination**

15  
16  
17 379 The study was reviewed by The Regional Health Authority Research Ethics Committee and  
18  
19 380 found to be outside of the scope of the ethics committee thus not in need of ethical approval.  
20  
21 381 All study participants will give informed consent.  
22  
23

24 382 The final scoring algorithm will contribute to the quality and relevance of the results of EQ-  
25  
26 383 5D applications in Norway, and it is highly likely that, when available, the EQ-5D-5L with a  
27  
28 384 Norwegian scoring algorithm will be the recommended instrument of choice for future  
29  
30 385 economic evaluations undertaken in Norway by the pharmaceutical industry and other  
31  
32 386 important users. Application of the same instrument and scoring across the health services and  
33  
34 387 industry will further enhance decision-making relating to scarce health care resources.  
35  
36 388 Moreover, scores based on Norwegian preferences will further enhance the appropriateness of  
37  
38 389 the EQ-5D in clinical and health services research and quality indicators work, including the  
39  
40 390 national quality registers.  
41  
42  
43  
44

45 391  
46  
47 392 The study results will be published in peer-review scientific journals, presented at appropriate  
48  
49 393 forums, including national and international conferences, and scoring algorithms made  
50  
51 394 publicly available for R, Stata and other widely used statistical software. Presentations will be  
52  
53 395 given to users of the research, including research centres that widely use the EQ-5D in  
54  
55 396 clinical, health services and health economics research in Norway.  
56  
57  
58  
59  
60 397

1  
2  
3  
4 398 **List of abbreviations**

5 399 EQ-VT EuroQol Valuation Technology

6  
7  
8 400 cTTO Composite time trade-off

9  
10  
11 401 DCE Discrete choice experiments

12  
13  
14 402 QALY Quality Adjusted Life Year

15  
16  
17 403 PROMs Patient Reported Outcomes Measures

18  
19  
20 404 NQR National Quality Registries

21  
22  
23 405 NICE National Institute for Health and Care Excellence

24  
25  
26 406 NIPH Norwegian Institute of Public Health

27  
28  
29 407 QC Quality control software included in the EQ-VT software

30  
31  
32 408

33  
34  
35 409

36  
37  
38 410 **Declarations**

39 411 **Competing interests**

40  
41  
42 412 The authors have no competing interests.

43  
44  
45 413 **Availability of data and material**

46  
47  
48 414 Not applicable.

49  
50  
51 415 **Funding**

52  
53  
54 416 The study is funded by the Norwegian Research Council (grant number: 262673) with  
55  
56 417 additional support from the EuroQol Foundation (EQ Project 20190280) and Norwegian  
57  
58 418 Institute of Public Health.  
59  
60

## 419 Author contributions

420 AG conceived the study and secured funding. TMH, YH and AG designed the study. LA, KR  
 421 and KS commented and recommended revisions. . TMH and AG drafted and revised the  
 422 manuscript. YH, LA, KR and KS have read and approved the final version. All authors agree  
 423 to be accountable for all aspects of the work.

424

## 425 References

- 426 1. Hagen, G.W., T.; Klemp, M.; *Helseøkonomisk evaluering ved Nasjonal kunnskapssenter for*  
 427 *helsetjenesten*. Norsk Epidemiologi, 2013. **23**(2): p. 157-164.
- 428 2. *Guidelines for the submission of documentation for single technology assessment (STA) of*  
 429 *pharmaceuticals*. 2018, Statens Legemiddelverk (National Medicine Agency).
- 430 3. Ottersen, T., et al., *A new proposal for priority setting in Norway: Open and fair*. Health  
 431 Policy, 2016. **120**(3): p. 246-51.
- 432 4. *På ramme alvor: alvorlighets og prioritering*. 2015, Report from working group appointed by  
 433 Norwegian Ministry of Health and Care Services.
- 434 5. *Principles for priority setting in health care— Summary of a white paper on priority setting in*  
 435 *the Norwegian health care sector 2015*, Norwegian Ministry of Health and Care Services.
- 436 6. Drummond MF, S.M., Torrance G, O'Brien B, Stoddart G. , *Methods for the economic*  
 437 *evaluation of health care programmes*. 3rd edition ed. 2005: Oxford University Press.
- 438 7. Devlin, N.J. and R. Brooks, *EQ-5D and the EuroQol Group: Past, Present and Future*. Appl  
 439 Health Econ Health Policy, 2017. **15**(2): p. 127-137.
- 440 8. Garratt, A., et al., *Quality of life measurement: bibliographic study of patient assessed health*  
 441 *outcome measures*. BMJ, 2002. **324**(7351): p. 1417.
- 442 9. Nord, E., *Cost-Value Analysis in Health Care: Making Sense out of QALYS*. 1999: Cambridge  
 443 University Press.
- 444 10. Wisloff, T., et al., *Estimating QALY Gains in Applied Studies: A Review of Cost-Utility Analyses*  
 445 *Published in 2010*. Pharmacoeconomics, 2014. **32**(4): p. 367-375.
- 446 11. EuroQol. *EQ-5D-5L | Self-complete version on paper*. 24.02.2020]; Available from:  
 447 [https://euroqol.org/eq-5d-instruments/eq-5d-5l-available-modes-of-administration/self-](https://euroqol.org/eq-5d-instruments/eq-5d-5l-available-modes-of-administration/self-complete-on-paper/)  
 448 [complete-on-paper/](https://euroqol.org/eq-5d-instruments/eq-5d-5l-available-modes-of-administration/self-complete-on-paper/).
- 449 12. EuroQol, *Sample UK English EQ-5D-5L Paper Self-complete version*.
- 450 13. Szende A, O.M., Devlin N (Eds.) *EQ-5D Value Sets: Inventory, Comparative Review and User*  
 451 *Guide*. 2007, Springer: Dordrecht, The Netherlands.
- 452 14. Devlin, N.J., et al., *Valuing health-related quality of life: An EQ-5D-5L value set for England*.  
 453 Health Econ, 2018. **27**(1): p. 7-22.
- 454 15. Ludwig, K., J.M. Graf von der Schulenburg, and W. Greiner, *German Value Set for the EQ-5D-*  
 455 *5L*. Pharmacoeconomics, 2018. **36**(6): p. 663-674.
- 456 16. Augustovski, F., et al., *An EQ-5D-5L value set based on Uruguayan population preferences*.  
 457 Qual Life Res, 2016. **25**(2): p. 323-33.
- 458 17. Hobbins, A., et al., *Utility Values for Health States in Ireland: A Value Set for the EQ-5D-5L*.  
 459 Pharmacoeconomics, 2018. **36**(11): p. 1345-1353.
- 460 18. Kim, S.H., et al., *The EQ-5D-5L valuation study in Korea*. Qual Life Res, 2016. **25**(7): p. 1845-  
 461 52.

- 1  
2  
3 462 19. Luo, N., et al., *Estimating an EQ-5D-5L Value Set for China*. Value Health, 2017. **20**(4): p. 662-  
4 463 669.
- 5 464 20. M, M.V., et al., *Dutch Tariff for the Five-Level Version of EQ-5D*. Value Health, 2016. **19**(4): p.  
6 465 343-52.
- 7 466 21. Pattanaphesaj, J., et al., *The EQ-5D-5L Valuation study in Thailand*. Expert Rev Pharmacoecon  
8 467 Outcomes Res, 2018. **18**(5): p. 551-558.
- 9 468 22. Purba, F.D., et al., *The Indonesian EQ-5D-5L Value Set*. Pharmacoeconomics, 2017. **35**(11): p.  
10 469 1153-1165.
- 11 470 23. Shafie, A.A., et al., *EQ-5D-5L Valuation for the Malaysian Population*. Pharmacoeconomics,  
12 471 2018.
- 13 472 24. Wong, E.L.Y., et al., *Assessing the Use of a Feedback Module to Model EQ-5D-5L Health States*  
14 473 *Values in Hong Kong*. Patient, 2018. **11**(2): p. 235-247.
- 15 474 25. Xie, F., et al., *A Time Trade-off-derived Value Set of the EQ-5D-5L for Canada*. Med Care,  
16 475 2016. **54**(1): p. 98-105.
- 17 476 26. Solberg, T.K., et al., *Health-related quality of life assessment by the EuroQol-5D can provide*  
18 477 *cost-utility data in the field of low-back surgery*. European spine journal : official publication  
19 478 of the European Spine Society, the European Spinal Deformity Society, and the European  
20 479 Section of the Cervical Spine Research Society, 2005. **14**(10): p. 1000-7.
- 21 480 27. Nilsson, E., L. Orwelius, and M. Kristenson, *Patient-reported outcomes in the Swedish*  
22 481 *National Quality Registers*. Journal of internal medicine, 2016. **279**(2): p. 141-53.
- 23 482 28. Hernández-Alava, M.P., S; Wailoo, A;, *Quality review of a proposed EQ-5D-5L value set for*  
24 483 *England*. 2018, Policy Research Unit in Economic Evaluation of Health and Care Interventions.  
25 484 Universities of Sheffield and York.: EEPRU Research Report 060.
- 26 485 29. *Position statement on use of the EQ-5D-5L valuation set for England (updated November*  
27 486 *2019)*. National Institute for Health and Care Excellence 2019 05.02.2019]; Available from:  
28 487 [https://www.nice.org.uk/about/what-we-do/our-programmes/nice-guidance/technology-](https://www.nice.org.uk/about/what-we-do/our-programmes/nice-guidance/technology-appraisal-guidance/eq-5d-5l)  
29 488 [appraisal-guidance/eq-5d-5l](https://www.nice.org.uk/about/what-we-do/our-programmes/nice-guidance/technology-appraisal-guidance/eq-5d-5l).
- 30 489 30. Dolan, P., *Modeling valuations for EuroQol health states*. Medical care, 1997. **35**(11): p. 1095-  
31 490 108.
- 32 491 31. van Hout, B., et al., *Interim scoring for the EQ-5D-5L: mapping the EQ-5D-5L to EQ-5D-3L*  
33 492 *value sets*. Value Health, 2012. **15**(5): p. 708-15.
- 34 493 32. Kularatna, S., et al., *Mapping Sri Lankan EQ-5D-3L to EQ-5D-5L Value Sets*. Value Health Reg  
35 494 Issues, 2017. **12**: p. 20-23.
- 36 495 33. Golicki, D., et al., *Interim EQ-5D-5L Value Set for Poland: First Crosswalk Value Set in Central*  
37 496 *and Eastern Europe*. Value Health Reg Issues, 2014. **4**: p. 19-23.
- 38 497 34. Olsen, J.A., A.N. Lamu, and J. Cairns, *In search of a common currency: A comparison of seven*  
39 498 *EQ-5D-5L value sets*. Health Econ, 2018. **27**(1): p. 39-49.
- 40 499 35. Bailey, H. and P. Kind, *Preliminary findings of an investigation into the relationship between*  
41 500 *national culture and EQ-5D value sets*. Qual Life Res, 2010. **19**(8): p. 1145-54.
- 42 501 36. Burstrom, K., et al., *Swedish experience-based value sets for EQ-5D health states*. Qual Life  
43 502 Res, 2014. **23**(2): p. 431-42.
- 44 503 37. Leidl, R. and P. Reitmeir, *An Experience-Based Value Set for the EQ-5D-5L in Germany*. Value  
45 504 Health, 2017. **20**(8): p. 1150-1156.
- 46 505 38. Sun, S., et al., *Experience-based VAS values for EQ-5D-3L health states in a national general*  
47 506 *population health survey in China*. Qual Life Res, 2015. **24**(3): p. 693-703.
- 48 507 39. NICE, *Guide to the methods of technology appraisal*. 2008: National Institute for Health and  
49 508 Clinical Excellence: London.
- 50 509 40. Brazier, J., et al., *Should patients have a greater role in valuing health states?* Appl Health  
51 510 Econ Health Policy, 2005. **4**(4): p. 201-8.
- 52 511 41. Dolan, P., *Thinking about it: thoughts about health and valuing QALYs*. Health Economics,  
53 512 2011. **20**(12): p. 1407-1416.
- 54  
55  
56  
57  
58  
59  
60



- 1  
2  
3 513 42. *Stivarga kommer inte att ingå i högkostnadsskyddet. [Stivarga will not be reimbursed]*  
4 514 T.D.a.P.B.A. (TLV). Editor. 2014, TLV: Stockholm.
- 5 515 43. Leidl, R. and P. Reitmeir, *A value set for the EQ-5D based on experienced health states:*  
6 516 *development and testing for the German population.* Pharmacoeconomics, 2011. **29**(6): p.  
7 517 521-34.
- 8 518 44. De Wit, G.A., J.J.V. Busschbach, and F.T. De Charro, *Sensitivity and perspective in the*  
9 519 *valuation of health status: whose values count?* Health Economics, 2000. **9**(2): p. 109-126.
- 10 520 45. Dolan, P., *NICE should value real experiences over hypothetical opinions.* Nature, 2009.  
11 521 **462**(7269): p. 35.
- 12 522 46. Heijink, R., P. Reitmeir, and R. Leidl, *International comparison of experience-based health*  
13 523 *state values at the population level.* Health Qual Life Outcomes, 2017. **15**(1): p. 138.
- 14 524 47. Dolan, P. and D. Kahneman, *Interpretations Of Utility And Their Implications For The*  
15 525 *Valuation Of Health\**. The Economic Journal, 2008. **118**(525): p. 215-234.
- 16 526 48. Cubi-Molla, P., K. Shah, and K. Burström, *Experience-Based Values: A Framework for*  
17 527 *Classifying Different Types of Experience in Health Valuation Research.* The Patient - Patient-  
18 528 *Centered Outcomes Research*, 2018. **11**(3): p. 253-270.
- 19 529 49. Oppe, M., et al., *A program of methodological research to arrive at the new international EQ-*  
20 530 *5D-5L valuation protocol.* Value Health, 2014. **17**(4): p. 445-53.
- 21 531 50. Oppe, M., et al., *EuroQol Protocols for Time Trade-Off Valuation of Health Outcomes.*  
22 532 *PharmacoEconomics*, 2016. **34**(10): p. 993-1004.
- 23 533 51. Galea, S. and M. Tracy, *Participation Rates in Epidemiologic Studies.* Annals of Epidemiology,  
24 534 2007. **17**(9): p. 643-653.
- 25 535 52. *Microdata.no*. 2019 12.03.2019]; Available from: <https://microdata.no/en/>
- 26 536 53. Purba, F.D., et al., *Employing quality control and feedback to the EQ-5D-5L valuation protocol*  
27 537 *to improve the quality of data collection.* Qual Life Res, 2017. **26**(5): p. 1197-1208.
- 28 538 54. Ramos-Goñi, J.M., et al., *Quality Control Process for EQ-5D-5L Valuation Studies.* Value in  
29 539 *Health*, 2017. **20**(3): p. 466-473.
- 30 540 55. Stolk, E., et al., *Overview, Update, and Lessons Learned From the International EQ-5D-5L*  
31 541 *Valuation Work: Version 2 of the EQ-5D-5L Valuation Protocol.* Value Health, 2019. **22**(1): p.  
32 542 23-30.
- 33 543 56. van Nooten, F., et al., *What should we know about the person behind a TTO?* The European  
34 544 *Journal of Health Economics*, 2018. **19**(9): p. 1207-1211.
- 35 545 57. Craig, B.M., et al., *Demographic differences in health preferences in the United States.* Med  
36 546 *Care*, 2014. **52**(4): p. 307-13.
- 37 547 58. van der Pol, M. and A. Shiell, *Extrinsic Goals and Time Tradeoff.* Medical Decision Making,  
38 548 2007. **27**(4): p. 406-413.
- 39 549 59. van Nooten, F.E., et al., *"Married with children" the influence of significant others in TTO*  
40 550 *exercises.* Health and Quality of Life Outcomes, 2015. **13**(1): p. 94.
- 41 551 60. Helgesson, G., et al., *Whom should we ask? A systematic literature review of the arguments*  
42 552 *regarding the most accurate source of information for valuation of health states.* Qual Life  
43 553 *Res*, 2020.

554

555

## 556 Tables

557 Table 1: Locations for recruitment of participants, by age group and health status

|         |                |
|---------|----------------|
| Healthy | Reduced health |
|---------|----------------|

| Young                                        | Middle-aged                               | Elderly                                        | All ages       | All ages               |
|----------------------------------------------|-------------------------------------------|------------------------------------------------|----------------|------------------------|
| Places of higher education                   | Workplaces                                | Eldery homes                                   | Public library | Hospitals              |
| Child daycare facilities/<br>Primary schools | Recreational organisations (sports teams) | Recreational organisations (choirs/orchestras) | Town hall      | Rehabilitation centres |
| Social welfare*                              | Social welfare*<br>Adult education*       | Community volunteer centres                    |                | Health centres         |

558 \*Locations chosen to increase participation of those with lower socio-economic status

559 Table 2: Example sampling of hospital catchment areas and quotas per catchment area

| Region        | Population in region | Catchment area | Population in catchment area | Quota per catchment area |
|---------------|----------------------|----------------|------------------------------|--------------------------|
| Northern      | 381907               | Hospital 1     | 130000                       | 140                      |
| Central       | 560690               | Hospital 2     | 60000                        | 205                      |
| Western       | 843899               | Hospital 3     | 330000                       | 309                      |
| South-Eastern | 2299890              | Hospital 4     | 500000                       | 448                      |
| South-Eastern | “                    | Hospital 5     | 160000                       | 143                      |
| South-Eastern | “                    | Hospital 6     | 280000                       | 251                      |

560

561 Table 3: Example of quotas within a sampled catchment area based on the composition of sex,  
562 age and educational level in the general population of the respective region (source: Official  
563 statistics for 2017 generated from microdata.no). Example given sampling scenario and  
564 catchment area for Hospital 1 in Table 2.

| Sex                       | Highest attained educational level | Age groups |       |       |       |       |       |     | Total quota per sex and educational level |
|---------------------------|------------------------------------|------------|-------|-------|-------|-------|-------|-----|-------------------------------------------|
|                           |                                    | 18-24      | 25-34 | 35-44 | 45-54 | 55-64 | 65-74 | 75+ |                                           |
| Male                      | Primary or secondary               | 8          | 9     | 8     | 9     | 9     | 7     | 5   | 56                                        |
|                           | Tertiary                           | 1          | 3     | 3     | 3     | 3     | 2     | 1   | 16                                        |
| Female                    | Primary or secondary               | 7          | 6     | 5     | 7     | 8     | 8     | 7   | 47                                        |
|                           | Tertiary                           | 1          | 5     | 5     | 5     | 3     | 2     | 1   | 22                                        |
| Total quota per age group |                                    | 17         | 22    | 22    | 25    | 22    | 18    | 14  | 140                                       |

565

566 Table 4. Reference data for the calculation of quotas, data for 2018 (<http://microdata.no>,  
567 Statistics Norway, data accessed: 12.03.2019)

| Region | Sex | Highest attained educational level | Age group |       |       |       |       |       |     |
|--------|-----|------------------------------------|-----------|-------|-------|-------|-------|-------|-----|
|        |     |                                    | 18-24     | 25-34 | 35-44 | 45-54 | 55-64 | 65-74 | 75+ |

|                      |        |                      |         |         |         |         |         |         |         |
|----------------------|--------|----------------------|---------|---------|---------|---------|---------|---------|---------|
| South-Eastern region | Male   | Primary or secondary | 117 220 | 130 448 | 133 470 | 143 252 | 119 278 | 94 473  | 62 167  |
|                      |        | Tertiary             | 13 603  | 72 661  | 77 273  | 66 785  | 51 553  | 40 368  | 19 650  |
|                      | Female | Primary or secondary | 100 571 | 94 904  | 99 033  | 120 226 | 114 228 | 107 739 | 103 859 |
|                      |        | Tertiary             | 24 196  | 104 395 | 101 833 | 79 908  | 55 565  | 34 126  | 17 126  |
| Western region       | Male   | Primary or secondary | 48 863  | 54 616  | 52 141  | 54 172  | 44 925  | 34 032  | 23 977  |
|                      |        | Tertiary             | 5 129   | 26 041  | 27 176  | 21 446  | 17 552  | 12 302  | 5 291   |
|                      | Female | Primary or secondary | 40 743  | 35 932  | 34 778  | 42 701  | 40 672  | 36 866  | 38 127  |
|                      |        | Tertiary             | 9 928   | 39 550  | 36 796  | 27 107  | 18 494  | 9 777   | 4 750   |
| Central region       | Male   | Primary or secondary | 32 425  | 33 771  | 32 095  | 36 110  | 32 525  | 26 289  | 18 441  |
|                      |        | Tertiary             | 3 674   | 15 730  | 15 703  | 13 497  | 11 291  | 8 664   | 3 521   |
|                      | Female | Primary or secondary | 26 707  | 21 526  | 21 130  | 28 292  | 29 998  | 28 218  | 28 275  |
|                      |        | Tertiary             | 6 456   | 23 177  | 22 577  | 18 320  | 12 267  | 6 980   | 3 024   |
| Northern region      | Male   | Primary or secondary | 22 976  | 23 320  | 21 793  | 25 812  | 23 582  | 20 282  | 13 464  |
|                      |        | Tertiary             | 1 736   | 7 895   | 8 724   | 9 427   | 7 450   | 5 273   | 1 845   |
|                      | Female | Primary or secondary | 18 357  | 15 382  | 14 562  | 19 478  | 20 589  | 20 492  | 19 767  |
|                      |        | Tertiary             | 3 470   | 13 212  | 14 402  | 13 721  | 8 872   | 4 300   | 1 707   |

568

569 **Figures**

570

571 Figure 1: Hospitals with Acute Care Function in Norway

572 Figure 2: Screenshot of visual aid for cTTO task in EQ-VT

573 Figure 3: Screenshot of visual aid for DCE task in EQ-VT

574 Figure 4: Screenshot of the feedback module in EQ-VT

1  
2  
3  
4  
5  
6  
7  
8  
9  
10  
11  
12  
13  
14  
15  
16  
17  
18  
19  
20  
21  
22  
23  
24  
25  
26  
27  
28  
29  
30  
31  
32  
33  
34  
35  
36  
37  
38  
39  
40  
41  
42  
43  
44  
45  
46  
47  
48  
49  
50  
51  
52  
53  
54  
55  
56  
57  
58  
59  
60

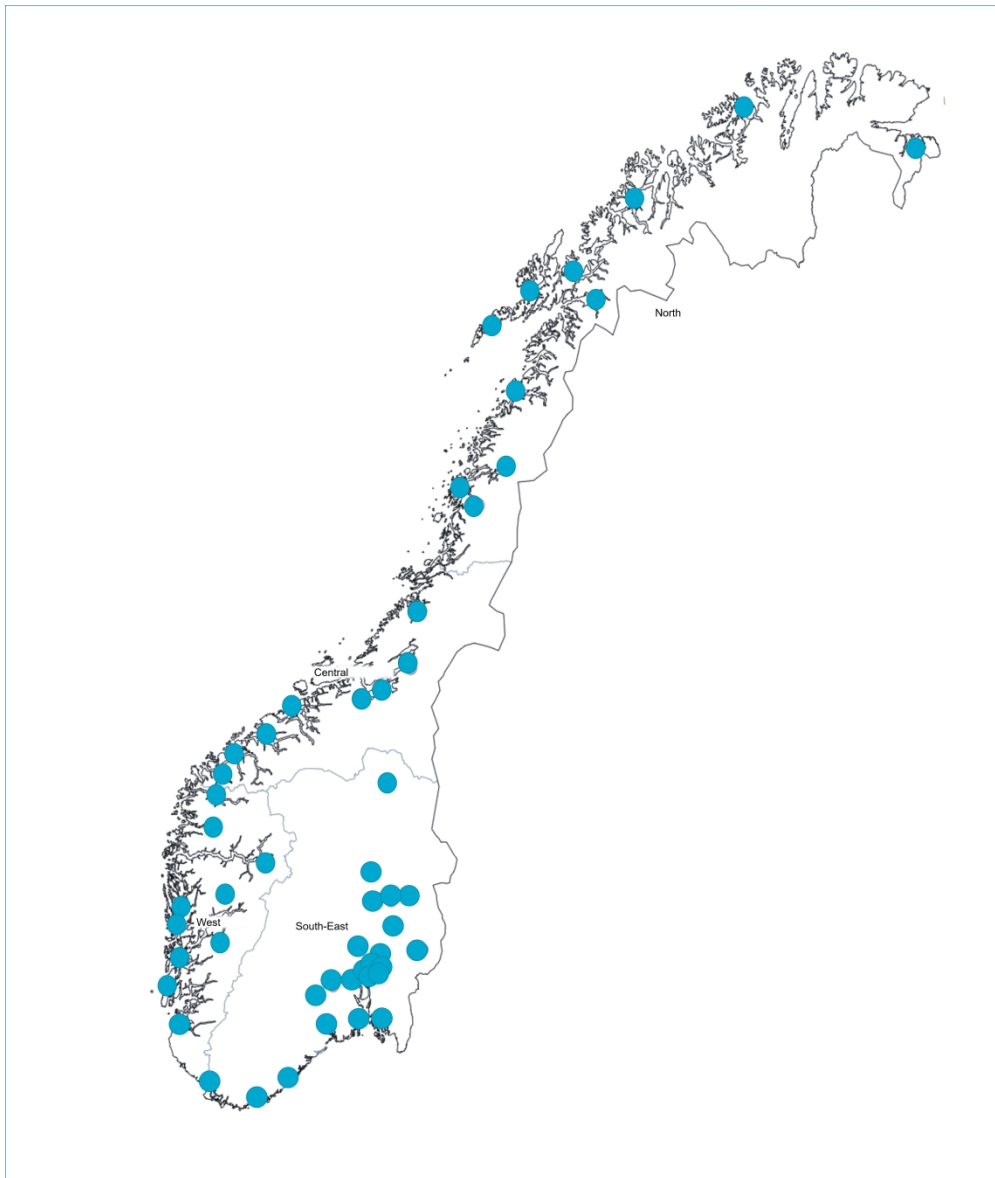

Figure 1: Hospitals with Acute Care Function in Norway

1  
2  
3  
4  
5  
6  
7  
8  
9  
10  
11  
12  
13  
14  
15  
16  
17  
18  
19  
20  
21  
22  
23  
24  
25  
26  
27  
28  
29  
30  
31  
32  
33  
34  
35  
36  
37  
38  
39  
40  
41  
42  
43  
44  
45  
46  
47  
48  
49  
50  
51  
52  
53  
54  
55  
56  
57  
58  
59  
60

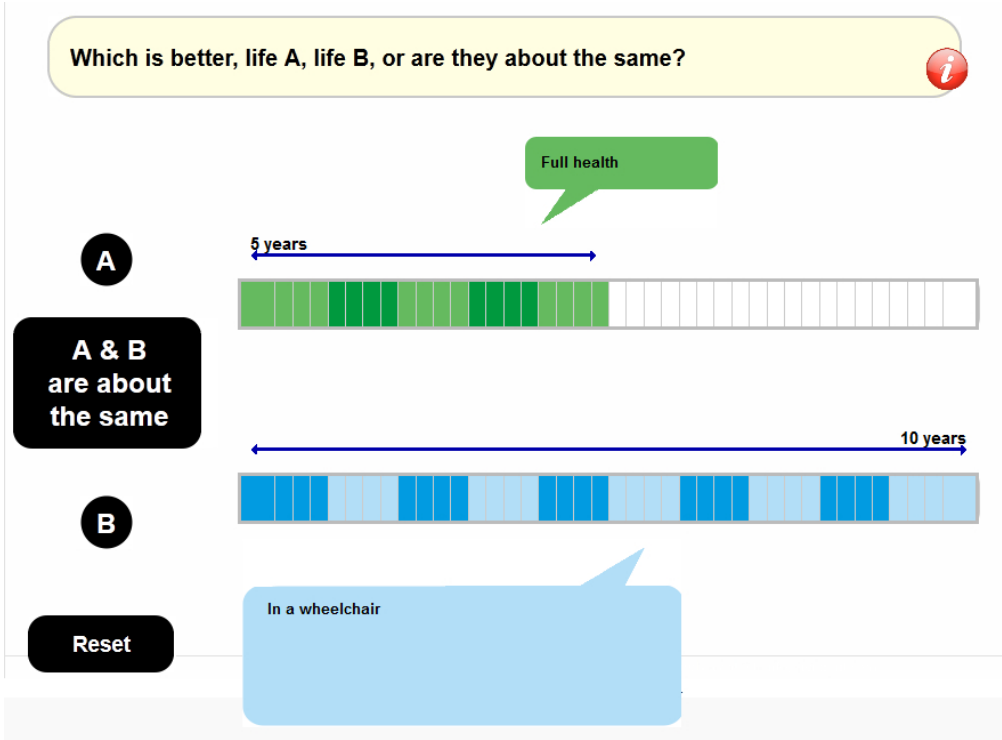

Figure 2: Screenshot of visual aid for cTTO task in EQ-VT (source: EuroQol Foundation)

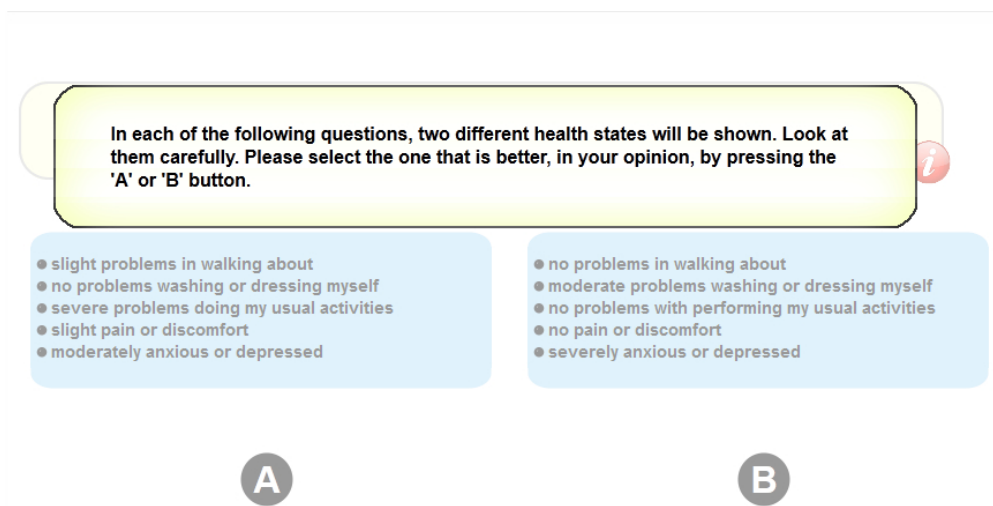

Figure 3: Screenshot of visual aid for DCE task in EQ-VT (source: EuroQoI Foundation)

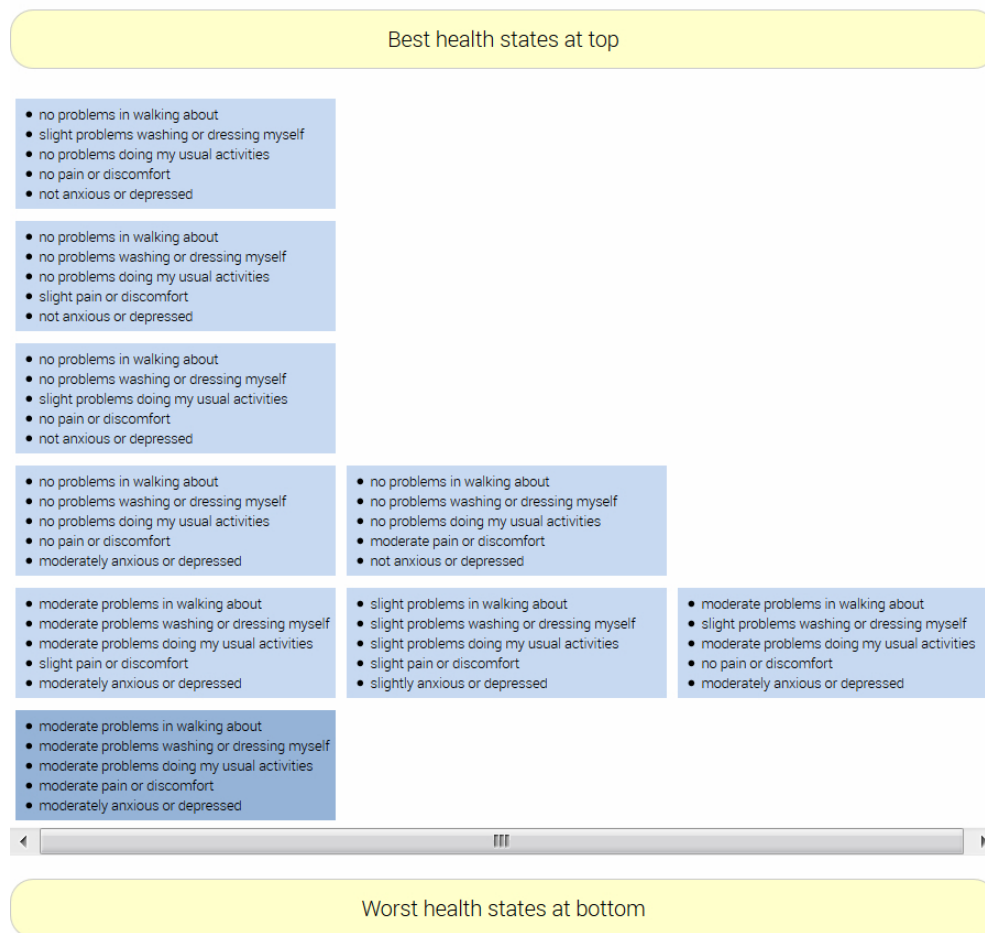

Figure 4: Screenshot of the feedback module in EQ-VT (source: EuroQol Foundation)

# BMJ Open

## Elicitation of Norwegian EQ-5D-5L Values for Hypothetical and Experience-based Health States Based on the EuroQol Valuation Technology (EQ-VT) Protocol

|                                 |                                                                                                                                                                                                                                                                                                                                                                                                                                                                                                                                                   |
|---------------------------------|---------------------------------------------------------------------------------------------------------------------------------------------------------------------------------------------------------------------------------------------------------------------------------------------------------------------------------------------------------------------------------------------------------------------------------------------------------------------------------------------------------------------------------------------------|
| Journal:                        | <i>BMJ Open</i>                                                                                                                                                                                                                                                                                                                                                                                                                                                                                                                                   |
| Manuscript ID                   | bmjopen-2019-034683.R2                                                                                                                                                                                                                                                                                                                                                                                                                                                                                                                            |
| Article Type:                   | Protocol                                                                                                                                                                                                                                                                                                                                                                                                                                                                                                                                          |
| Date Submitted by the Author:   | 13-May-2020                                                                                                                                                                                                                                                                                                                                                                                                                                                                                                                                       |
| Complete List of Authors:       | Hansen, Tonya; Norwegian Institute of Public Health, Health Services Research<br>Helland, Ylva; Norwegian Institute of Public Health, Health Services Research<br>Augustad, Liv ; University of Oslo Faculty of Medicine, Health Management and Health Economics<br>Rand, Kim; Akershus University Hospital, Health Services Research Unit<br>Stavem, K; University of Oslo, Institute of Clinical Medicine; Akershus University Hospital, Pulmonary Medicine<br>Garratt, Andrew ; Norwegian Institute of Public Health, Health Services Research |
| <b>Primary Subject Heading</b>: | Health economics                                                                                                                                                                                                                                                                                                                                                                                                                                                                                                                                  |
| Secondary Subject Heading:      | Research methods, Health services research                                                                                                                                                                                                                                                                                                                                                                                                                                                                                                        |
| Keywords:                       | Health economics < HEALTH SERVICES ADMINISTRATION & MANAGEMENT, HEALTH ECONOMICS, Health policy < HEALTH SERVICES ADMINISTRATION & MANAGEMENT                                                                                                                                                                                                                                                                                                                                                                                                     |
|                                 |                                                                                                                                                                                                                                                                                                                                                                                                                                                                                                                                                   |

SCHOLARONE™  
Manuscripts





I, the Submitting Author has the right to grant and does grant on behalf of all authors of the Work (as defined in the below author licence), an exclusive licence and/or a non-exclusive licence for contributions from authors who are: i) UK Crown employees; ii) where BMJ has agreed a CC-BY licence shall apply, and/or iii) in accordance with the terms applicable for US Federal Government officers or employees acting as part of their official duties; on a worldwide, perpetual, irrevocable, royalty-free basis to BMJ Publishing Group Ltd ("BMJ") its licensees and where the relevant Journal is co-owned by BMJ to the co-owners of the Journal, to publish the Work in this journal and any other BMJ products and to exploit all rights, as set out in our [licence](#).

The Submitting Author accepts and understands that any supply made under these terms is made by BMJ to the Submitting Author unless you are acting as an employee on behalf of your employer or a postgraduate student of an affiliated institution which is paying any applicable article publishing charge ("APC") for Open Access articles. Where the Submitting Author wishes to make the Work available on an Open Access basis (and intends to pay the relevant APC), the terms of reuse of such Open Access shall be governed by a Creative Commons licence – details of these licences and which [Creative Commons](#) licence will apply to this Work are set out in our licence referred to above.

Other than as permitted in any relevant BMJ Author's Self Archiving Policies, I confirm this Work has not been accepted for publication elsewhere, is not being considered for publication elsewhere and does not duplicate material already published. I confirm all authors consent to publication of this Work and authorise the granting of this licence.

1  
2  
3 **1 Elicitation of Norwegian EQ-5D-5L Values for Hypothetical and Experience-based**  
4  
5 **2 Health States Based on the EuroQol Valuation Technology (EQ-VT) Protocol**  
6  
7  
8  
9

10 4 Tonya Moen Hansen, MSc<sup>1</sup> tonyamoen.hansen@fhi.no  
11  
12 5 Ylva Helland, PhD<sup>1</sup> ylva.helland@fhi.no  
13  
14 6 Liv Ariane Augestad, PhD<sup>2</sup> l.a.augestad@medisin.uio.no  
15  
16 7 Kim Rand, PhD<sup>3</sup> kim.rand@ahus.no  
17  
18 8 Knut Stavem, MD, MPH, PhD<sup>3-5</sup> knut.stavem@medisin.uio.no  
19  
20 9 Andrew Garratt, PhD<sup>1</sup> andrew.garratt@fhi.no  
21  
22  
23  
24

25 11 <sup>1</sup>Division for Health Services, Norwegian Institute of Public Health, Oslo, Norway

26  
27 12 <sup>2</sup>Department of Health Management and Health Economics, Medical Faculty, University of Oslo,  
28  
29 13 Oslo, Norway

30  
31 14 <sup>3</sup>Health Services Research Unit, Akershus University Hospital, Norway

32  
33 15 <sup>4</sup>Institute of Clinical Medicine, University of Oslo, Norway

34  
35 16 <sup>5</sup>Department of Pulmonary Medicine, Medical Division, Akershus University Hospital, Norway  
36  
37  
38

39 18 Corresponding author:

40  
41 19 Tonya Moen Hansen  
42  
43  
44  
45

46 21 Word count: 3872  
47  
48  
49

50  
51 **23 Abstract**

52  
53 24 **Introduction** Norway is one of several European countries that lacks a national value set and  
54  
55 25 scoring algorithm for the EQ-5D. Recent studies have found differences between countries in  
56  
57 26 terms of health values or preferences for health states described by instruments such as the  
58  
59 27 EQ-5D. The project aims to model a national value set for the five level version of the EQ-5D

1  
2  
3 28 (EQ-5D-5L) based on values elicited from a representative sample of the Norwegian adult  
4  
5 29 general population in terms of region, age, sex, and level of education. Using a sampling  
6  
7 30 strategy supporting the collection of values for both hypothetical and experienced health  
8  
9 31 states, the study will have the additional aim of assessing the feasibility of collecting  
10  
11 32 experience-based values in accordance with the latest EQ-5D valuation study protocol, and  
12  
13 33 comparing values with those given for hypothetical health states.  
14  
15  
16  
17

18 34 **Methods and analysis** Multi-stage random sampling and quota-sampling will contribute to  
19  
20 35 representativeness. To increase the number of valuations of experienced health states, those  
21  
22 36 with less than perfect health will be over-sampled, increasing the total number of interviews  
23  
24 37 from 1000 to 1300–1500. The most recent EQ-5D valuation protocol will be followed which  
25  
26 38 includes computer assisted face-to-face, one-to-one interviews and use of composite time  
27  
28 39 trade-off (cTTO) and discrete choice experiments (DCE).  
29  
30  
31  
32

33 40 **Ethics and dissemination** The study has been reviewed and found to be outside of the scope  
34  
35 41 of the ethics committee and thus not in need of ethical approval. The study findings study will  
36  
37 42 be disseminated through peer-reviewed publications, conference presentations, and  
38  
39 43 summaries for key stakeholders and partners in the field. The scoring algorithms will be  
40  
41 44 available for widely used statistical software.  
42  
43  
44  
45

46 45 **Keywords:** Utilities, Health state valuation, EQ-5D, Time trade-off, QALY  
47  
48

## 49 46 **Article summary**

### 50 47 **Strengths and limitations of this study**

- 51 48 • This is the first Norwegian valuation study with cTTO (composite time trade-off) and  
52 49 DCE (discrete choice experiment) undertaken on a scale large enough to meet the  
53 50 recommendations of the most recent EQ-5D protocol.  
54  
55  
56  
57  
58  
59  
60

- 51 • Sampling strategy designed to both ensure representativeness of the final sample  
52 according to geographical region, age, sex and educational level and increase the  
53 number of experience-based valuations.
- 54 • Data collection restricted to EuroQol protocol, primarily developed for hypothetical  
55 health state valuation, but with the additional aim of collecting experience-based  
56 valuations. Study design does not allow for the assessment of methods other than  
57 those described in the EQ-VT protocol.
- 58 • Restricted samples for comparisons of experience-based valuations.
- 59 • High respondent burden experienced in interviews limits the scope for addressing  
60 additional methodological questions.

## 62 **Introduction**

63 Economic evaluation undertaken by the Norwegian Institute of Public Health and the  
64 Norwegian Medicine Agency increasingly informs decisions about the introduction of new  
65 drugs and other health technologies in Norway [1, 2]. The Norheim Committee [3] and  
66 Magnussen Working Group [4] proposed methods to enhance the quality of economic  
67 evaluation, thereby further strengthening the role of economic evaluation in decision-making.  
68 The Ministry of Health followed up these proposals in a 2016 White Paper to Parliament on  
69 principles for priority setting in health care [5].

70  
71 Given the important role and impact of economic evaluation, it is important that the methods  
72 it incorporates, including cost-utility analysis, are consistent with societal values regarding  
73 publicly financed health care. Economic evaluation, when taking into account societal values,  
74 often takes the form of cost-utility analyses with the estimation of the incremental cost per  
75 Quality Adjusted Life Year (QALY) gained [6]. QALY takes the integral of health-related

1  
2  
3 76 quality of life (HRQoL) over time, with HRQoL represented on a scale where 1 indicates a  
4  
5 77 preference equal to that for full health and 0 implies a health state equal to that of being dead.  
6  
7 78 Values are typically derived using general population surveys where respondents consider the  
8  
9  
10 79 relative undesirability of different health states described using instruments such as the EQ-  
11  
12 80 5D [7]. After assigning values to health states described by an instrument, QALYs are  
13  
14 81 calculated by multiplying the health state value by the length of time spent in each. Evaluation  
15  
16 82 of alternative technologies then involves comparison of incremental QALYs gained over  
17  
18 83 incremental costs for new vs. existing technologies.  
19  
20  
21  
22 84

23  
24 85 Several instruments are available to calculate QALYs, of which the EQ-5D is by far the most  
25  
26 86 widely applied both internationally and in Norway [8-10]. The EQ-5D™, a trade mark of the  
27  
28 87 EuroQol Research Foundation, is available in over 150 languages [11] in the self-complete  
29  
30 88 paper version [12], and national value sets and normative data exist for over 20 countries [7,  
31  
32 89 13-25]. It is brief, widely tested, and includes five important aspects of health (mobility, self-  
33  
34 90 care, usual activities, pain/discomfort and anxiety/depression), with the most recent version  
35  
36 91 having five levels (5L) from no problems to severe problems. The EQ-5D is considered  
37  
38 92 highly acceptable to most patient groups and feasible for application where a short-form  
39  
40 93 general measure of health is required. The instrument has had widespread application in  
41  
42 94 research including clinical trials, population health surveys, in both Norwegian [26] and  
43  
44 95 Swedish National Quality Registries (NQR) [27], and more recently as a health care quality  
45  
46 96 indicator as part of the National Health Service for England and Wales Patient Reported  
47  
48 97 Outcomes Measures (PROMs) programme [14].  
49  
50  
51  
52  
53  
54 98

55  
56 99 The Norwegian Medicines Agency recommends the use of EQ-5D in all technology  
57  
58 100 assessments and the use of a 5L tariff for studies where the 5L version has been used [2]. In  
59  
60

1  
2  
3 101 the absence of a Norwegian tariff, the 2018 Agency guidelines currently recommend the use  
4  
5 102 of the EQ-5D-5L tariff for England [14] where EQ-5D-5L has been used. However, criticism  
6  
7 103 has been levelled at the English tariff including concerns with data quality in which serious  
8  
9 104 deficiencies were revealed [28]. The English 5L tariff followed an early protocol, which has  
10  
11 105 since been updated with the aim of improving data quality and interview techniques.  
12  
13 106 Following these concerns, and in contrast to recommendations of the Norwegian Medicines  
14  
15 107 Agency, NICE continues to recommend the use of the 3L tariff over the 5L tariff, with 5L  
16  
17 108 values mapped onto 3L where appropriate [29].  
18  
19  
20  
21  
22

23  
24 110 The EQ-5D is widely used in Norway, including the national quality registers where it is the  
25  
26 111 most widely used patient-reported outcome measure. A national EQ-5D-5L value set and  
27  
28 112 scoring algorithm is highly anticipated and will enhance the validity of economic evaluation  
29  
30 113 in Norway. Norwegian EQ-5D users have largely relied on the EQ-5D-3L scoring algorithm  
31  
32 114 from the UK [30], with a crosswalk-based approach [31] for studies that have used the 5L  
33  
34 115 version. Crosswalk-based approaches have several limitations related to issues with data  
35  
36 116 dependency and differences in scale range, and are an interim solution pending a national 5L  
37  
38 117 value set [31-33]. Cross-national comparisons of national EQ-5D-5L value sets also suggest  
39  
40 118 that there might be substantial differences across countries [13, 34] with culture and values  
41  
42 119 having a role [35]. Values for health for the 5L version of the EQ-5D, that are representative  
43  
44 120 for the Norwegian general population, will enhance the validity and legitimacy of economic  
45  
46 121 evaluation in Norway.  
47  
48  
49  
50

51 122  
52  
53 123 With few exceptions [36-38], existing EQ-5D value sets are based on the general population  
54  
55 124 valuing hypothetical health states, which follows recommendations that economic evaluation  
56  
57 125 should include societal preferences [39]. In recent years there has been some criticism  
58  
59  
60

1  
2  
3 126 levelled at this approach, questioning the validity of health state valuations from a general  
4  
5 127 population lacking the adequate experience or knowledge of the health states, which they  
6  
7  
8 128 value in the form of hypothetical health states [40, 41]. An alternative approach, as  
9  
10 129 recommended by Sweden's Dental and Pharmaceutical Benefits Agency [42], involves  
11  
12 130 individuals valuing their own health state to give experience-based values or basing their  
13  
14 131 valuations on other forms of experience. The debate on whether to use hypothetical or  
15  
16  
17 132 experience-based values is to a certain extent a normative issue, relating to what we aim to  
18  
19 133 maximize [43]. However, there are a number of empirical questions pertaining to experience-  
20  
21 134 based values. Arguably, patients have a better understanding of the consequences of reduced  
22  
23 135 health on quality of life [41, 44-46]. On the other hand, they may have trouble imagining life  
24  
25 136 in full health, may underreport impact of disease due to adaptation or changes in expectations  
26  
27  
28 137 over time [44, 47], or may be less inclined to value their current health state as a state that is  
29  
30 138 worse than being dead. Experience-based valuations, if better understood and elicited from  
31  
32  
33 139 representative samples of the general population may however be suitable for inclusion as  
34  
35 140 societal values. The feasibility of collecting experience-based values, the assessment of how  
36  
37 141 those with less than perfect health value their current health state and other health states in  
38  
39  
40 142 general, and how different forms of experience may influence health state valuations, are new  
41  
42 143 areas for research to which this study will contribute [48].  
43  
44  
45 144

46  
47 145 The project will derive a Norwegian EQ-5D-5L value set representative of region, age, sex  
48  
49 146 and level of education composition in the Norwegian adult general population. Furthermore,  
50  
51 147 the study will allow for comparisons of experience-based and hypothetical health state  
52  
53 148 valuation.  
54  
55

56 149  
57  
58  
59  
60

## 150 **Methods and analysis**

151 Values for EQ-5D-5L health states will be obtained by electronic data collection including  
152 computer assisted face-to-face, one-to-one interviews and the use of composite time trade-off  
153 (cTTO) and discrete choice experiments (DCE) [49, 50]. The latest EQ-5D-5L protocol will  
154 be followed including EuroQol Valuation Technology (EQ-VT).

### 156 *Sampling*

157 Respondents must be aged 18 years or older, resident in Norway and proficient in Norwegian.  
158 Following EQ-VT (EuroQol Valuation Technology) protocol, sample size is set to a minimum  
159 of 1000 individuals with each valuing 10 health states, which gives the recommended 10,000  
160 responses [50]. Additional 300-500 interviews, based on the oversampling of those with less  
161 than perfect health, will increase the number of valuations of experienced health states.

162  
163 Norway is a Northern European country with a population of slightly more than 5 million, and  
164 a universal health care system. The population covers a comparatively large land mass, and  
165 for many there may be several hours travel time to the nearest hospital or large city.

166 Urbanisation has further contributed to variation in demographic characteristics at the regional  
167 level. These factors combined with local culture, politics and traditions mean that  
168 geographical considerations are important to the design of the study.

169  
170 The study will use a combination of multistage random sampling and quota sampling ensuring  
171 representativeness according to geography, age, sex and educational level. The first stage of  
172 sampling will be of geographical areas, here defined as municipalities within each acute care  
173 hospital catchment area. Norway's four regional health authorities include Northern, Central,  
174 Western and South-Eastern, with more than half the population residing in the South-Eastern



1  
2  
3 175 health region. The catchment areas served by the 54 acute care hospitals cover all Norwegian  
4  
5 176 residents (see Figure 1). They vary considerably in the number of residents that they serve,  
6  
7 177 from 15,000 up to 500,000 residents. One acute care hospital will be randomly selected from  
8  
9 178 each health region with the exception of the South-Eastern region, where three will be  
10  
11 179 randomly selected to account for the disproportionate number of people residing in this  
12  
13 180 region. Hospital catchment areas within each region will be sampled with proportional  
14  
15 181 allocation, ensuring equal probability proportionate to the number of people residing in each  
16  
17 182 area within the region.  
18  
19  
20  
21  
22

23  
24 184 Within each sampled geographical area, the possible locations for data collection will  
25  
26 185 constitute the sample frame for the second stage of sampling (Table 1). Locations will include  
27  
28 186 public places (e.g. public libraries, town halls), workplaces, recreational organisations (e.g.  
29  
30 187 sports clubs), and healthcare providers (e.g. hospitals, rehabilitation institutions). The bodies  
31  
32 188 concerned must be willing to grant the study permission for data collection and cooperate  
33  
34 189 with provision of a suitable space for completion of the interviews. The locations will act as  
35  
36 190 clusters of possible respondents, stratified into groups based on the characteristics of target  
37  
38 191 respondents, e.g. age and educational level. Stratification will increase homogeneity per  
39  
40 192 cluster and ensure the representation of specific groups less likely to participate including  
41  
42 193 those with poorer health, lower socio-economic status, or faced with time constraints,  
43  
44 194 including those with young children or in full-time employment [51]. Locations within each  
45  
46 195 group in the sample frame will be randomly selected. The number of locations selected within  
47  
48 196 each sample frame will be based on the size of the area and quotas. Response rates,  
49  
50 197 recruitment and data quality will be assessed for the different location strata and compared  
51  
52 198 across catchment areas.  
53  
54  
55  
56  
57  
58  
59  
60

1  
2  
3 200 Within each catchment area and at the respondent level, quota sampling will be applied  
4  
5 201 according to age, sex and level of education (see Table 2 and 3). The total quota will first be  
6  
7 202 allocated to each region proportionate to the number of people residing in each region. For the  
8  
9 203 three regions with one sampled hospital catchment area, the quota for each of these hospital  
10  
11 204 catchment areas will correspond to the regional quota. In the South-Eastern region, the  
12  
13 205 regional quota is further allocated to each hospital catchment area proportionate to the number  
14  
15 206 of people residing in each of these areas. The quota is then allocated to groups according to  
16  
17 207 gender, age group (young adults: age 18-34, middle-aged adults: age 35-64, elderly: age 65+)  
18  
19 208 and level of education (lower education, no higher than high school education, higher  
20  
21 209 education - bachelor, masters or PhD) equivalent to the distribution of these attributes in the  
22  
23 210 respective regions. The quotas for each group are calculated using data available from  
24  
25 211 <http://microdata.no> (see Table 4), a national platform in Norway giving researchers direct  
26  
27 212 access to national registries for which Statistics Norway has processing authority, such as the  
28  
29 213 Norwegian National Registry, National Education Database, labour market data, register for  
30  
31 214 Personal Tax Payers and FD-Trygd (event history database) [52].  
32  
33  
34  
35  
36  
37  
38  
39

40 216 The study will largely rely on recruitment of potential participants by contact persons at each  
41  
42 217 sampled location. Contact persons will assist in identifying and recruiting potential  
43  
44 218 respondents to the study. Prior to data collection, contact persons will receive information and  
45  
46 219 materials for publication in local newspapers and social media designed to enhance  
47  
48 220 participation. In addition to the recruitment of respondents through locations, potential  
49  
50 221 respondents will be able to contact the project group for more information about the study and  
51  
52 222 enquire about participation. Potential respondents will be informed of a gift incentive. Cash  
53  
54 223 has been found to be more effective than other incentives for increasing response rates and  
55  
56 224 following the interview, respondents will receive a cash card equivalent to 30 Euros.  
57  
58  
59  
60

1  
2  
3 225  
4  
5 226 Data collection will take place from November 2019 to June 2020. Depending on the final  
6  
7  
8 227 sampling, and with an estimate of a minimum of four interviews per interviewer per day, a  
9  
10 228 minimum of 55-80 working days are required for data collection. The recruitment strategy  
11  
12 229 will be piloted in the catchment area sampled closest to Oslo. Necessary adjustments will  
13  
14 230 follow before data collection proceeds in the rest of the country.  
15  
16

17 231

### 19 232 *Interviewer training*

21 233 Interviewers with Masters education level or equivalent will receive training in accordance  
22  
23 234 with EuroQol Foundation guidelines and recommendations, with initial training prior to, and  
24  
25 235 revised training after, the first phase of data collection [53]. Based on existing studies and  
26  
27 236 recommendations from EuroQol (Elly Stolk, personal communication), eight to twelve  
28  
29 237 interviewers are required.  
30  
31

32 238

35 239 Quality control (QC) reports will help monitor progress and data quality throughout [54, 55].  
36  
37 240 The reports will include assessments of protocol compliance, face validity of data collected  
38  
39 241 and value distributions per interviewer. QC reports have been found to further the  
40  
41 242 homogeneity of interviewer performance and reduce protocol violations and the number of  
42  
43 243 inconsistent responses [54]. Interviewers not meeting pre-defined standards will be flagged,  
44  
45 244 recommended for retraining and ultimately excluded. Evaluation of the data collected and  
46  
47 245 interviewer performance will be regularly discussed with interviewers in face-to-face group  
48  
49 246 meetings throughout data collection, and with EuroQol contact persons.  
50  
51

52 247

### 56 248 *EuroQol Valuation Technology*

1  
2  
3 249 EQ-VT was developed to meet the challenges involved with valuation of the 5L version of the  
4  
5 250 EQ-5D, with emphasis on improving data quality and cross-country comparability [49]. The  
6  
7 251 standard protocol includes digital representation of visual aids to assist the respondent  
8  
9  
10 252 throughout the interview (see Figures 2 and 3). The study will use the portable version of the  
11  
12 253 software, EQ-PVT, which for the respondent has the same functionality and for the most part  
13  
14 254 resembles the standard EQ-VT software package.  
15  
16

17 255  
18  
19 256 The interview will start with administration of the EQ-5D-5L questionnaire, including the  
20  
21 257 visual analogue scale (VAS), followed by background questions for age, sex and experience  
22  
23 258 with serious illness. Next, composite time trade-off (cTTO) is administered, beginning with  
24  
25 259 an explanation of the task demonstrated with “the wheelchair example” including the “worse  
26  
27 260 than dead” part of the task. This is followed by practice tasks for three states described with  
28  
29 261 the EQ-5D-5L descriptive system, selected to reflect a mild, moderate, and severe health state,  
30  
31 262 to familiarise the respondent further with the cTTO, the concept of health states worse than  
32  
33 263 being dead and the use of lead-time in the cTTO for the valuation of such states. Lastly,  
34  
35 264 respondents are administered their current health state as a cTTO task, allowing for the  
36  
37 265 comparison of how respondents value their own health state with both cTTO and VAS.  
38  
39  
40  
41  
42  
43

44 267 Respondents are randomized to one of 10 TTO blocks of EQ-5D-5L health states, each  
45  
46 268 consisting of 10 health states, one of which is always the worst state (level 5 on each  
47  
48 269 dimension, state 55555), and one among the 5 mildest states (11112, 11121, 11211, 12111,  
49  
50 270 and 21111), for a total of 86 unique EQ-5D-5L health states for direct valuation [49].  
51  
52

53 271 Respondents get the opportunity to review their responses in a feedback module (see Figure  
54  
55 272 4), where individual task responses can be removed. Upon completion of the TTO tasks,  
56  
57 273 respondents are randomized to one of 28 state pair blocks for discrete choices, each block  
58  
59  
60

1  
2  
3 274 consisting of seven state pairs. In both the TTO and DCE parts of the interview, the order of  
4  
5 275 presentation is randomized. The randomized TTO and DCE tasks do not explicitly include a  
6  
7 276 valuation of the respondents own health state, however respondents can by chance be  
8  
9  
10 277 presented their own health state as a choice, in which case the task will be completed as  
11  
12 278 normal.

13  
14 279  
15  
16  
17 280 The interview ends with further background questions specific to this study relating to  
18  
19 281 variables known to be associated with valuations of health states including caregiver status,  
20  
21 282 educational level and marital status, [56-59]. The influence of such variables will be assessed  
22  
23 283 for the final value set.

24  
25  
26 284

### 27 28 285 *Analysis*

29  
30 286 The demographic characteristics and health status, i.e. EQ-5D-5L profile, of respondents will  
31  
32 287 be assessed and compared to national data. Parallel to this study, the Norwegian Institute of  
33  
34 288 Public Health (NIPH) has initiated data collection for a postal survey assessing the health  
35  
36 289 status of the Norwegian population using the EQ-5D-5L, allowing for comparison of the  
37  
38 290 health status of study populations. Health state values for EQ-5D-5L will be estimated  
39  
40 291 through statistical modelling of the survey data. The EQ-5D protocols are not prescriptive  
41  
42 292 with regard to modelling and approaches will depend on the characteristics of the data  
43  
44 293 obtained [50]. Following previous research, different models will be assessed including either  
45  
46 294 the cTTO data, or combining the cTTO and DCE data in a hybrid model, and the results  
47  
48 295 compared for adequacy with those for existing national value sets [14-25]. Modelling of  
49  
50 296 values for the national value set will exclude valuations from respondents recruited from  
51  
52 297 locations specifically for the collection of experience-based values and the valuations of  
53  
54 298 respondents' own health state. Subgroup analysis will identify variables contributing to health  
55  
56  
57  
58  
59  
60

1  
2  
3 299 state valuation in the Norwegian population. Values for health states defined as respondents'  
4  
5 300 "own health today" will be compared with values estimated for the same health states by the  
6  
7 301 general population. In addition, all experienced-based valuations by those with serious illness  
8  
9 302 and/or less than perfect health will be compared to valuations based on the total general  
10  
11 303 population sample and, given sufficient data, those without experience of serious illness  
12  
13 304 and/or with perfect health today. To assess experience-based valuations, and explore both the  
14  
15 305 wider and more narrow concepts of experience-based valuations [48], three potential profiles  
16  
17 306 will be assessed; 1) respondents' valuation of own health state, 2) valuations given by  
18  
19 307 respondents recruited from locations specifically chosen to target those with poorer health, i.e.  
20  
21 308 health services, 3) valuations given by respondents who have indicated that they have  
22  
23 309 experience with serious illness.  
24  
25  
26  
27  
28  
29

310

### 311 *Patient and Public Involvement*

312 Patients and members of the public were not invited to comment on the study design or  
33  
34  
35 313 contribute to the writing or editing of this document for readability or accuracy.  
36  
37  
38  
39

314

315

### 316 *Strengths and limitations*

317 This is the first Norwegian valuation study with both cTTO and DCE undertaken on a scale  
32  
33  
34  
35  
36  
37  
38  
39  
40  
41  
42  
43  
44  
45 318 large enough to meet the most recent EQ-5D protocol. The study intends to complete 1300-  
46  
47  
48  
49  
50 319 1500 face-to-face computer-assisted interviews across a country with a relatively dispersed  
51  
52 320 population of citizens and large geographical distances between them. Data collection  
53  
54 321 involves a small number of interviewers working over an eight-month period.  
55  
56  
57  
58  
59  
60

322

1  
2  
3 323 Both the duration and magnitude of the tasks involved make the interview demanding. It is  
4  
5 324 important that data collection is cost-effective, which includes considerations of data quality,  
6  
7 325 representativeness and total number of valuations. Given the strategy of sampling locations  
8  
9 326 and organisations rather than individuals, the assessment of its effectiveness in terms of  
10  
11 327 number and representativeness of respondents will be important following the initial data  
12  
13 328 collection period. Poor recruitment and data collection in remote geographical locations will  
14  
15 329 be costly. The number and characteristics of respondents per location will be monitored  
16  
17 330 throughout data collection. Adaptive sampling will allow for inclusion of additional locations  
18  
19 331 where response rates are low and quotas are not met. Additional locations will be chosen at  
20  
21 332 random from the predefined frame of possible locations within the selected geographical area.  
22  
23 333  
24  
25 334 Due to the need for extensive training, interview experience, and understanding of the task,  
26  
27 335 only eight to twelve interviewers will be included. This will give more control over the data  
28  
29 336 collection and the quality of the data collected. However, this and potential costs saved in  
30  
31 337 terms of interviewer recruitment, training and travel costs, must be balanced against the  
32  
33 338 increased impact of any loss of interviewers through illness or resignation during data  
34  
35 339 collection. Norway has a harsh winter climate and apart from the Southern and Eastern  
36  
37 340 region, where the interviewers are based, the interviews will primarily take place outside the  
38  
39 341 winter months to reduce the risk of travel delays and interviewer illness. The NIPH, which is  
40  
41 342 conducting the research, has several experienced interviewers familiar with the study who will  
42  
43 343 be able to complete training and contribute to data collection if needed.  
44  
45 344  
46  
47  
48  
49  
50  
51  
52  
53  
54 345 The main justification for the strategy of sampling stratified locations and the use of quotas on  
55  
56 346 the respondent level is to ensure representativeness of the final sample according to  
57  
58 347 geographical region, age, sex and educational level. An additional quota will be used to  
59  
60

1  
2  
3 348 recruit those with less than perfect health, through locations such as hospitals and  
4  
5 349 rehabilitation centres. Locations will also be selected to directly seek out others who are  
6  
7  
8 350 typically harder to reach and are less likely to participate in research studies, such as those  
9  
10 351 with different ethnic backgrounds or with young children. Studies have found that some  
11  
12 352 attributes, such as marital and caregiver status/having young children, may influence the  
13  
14 353 respondents response to the task, such as their willingness to trade time in the TTO task,  
15  
16  
17 354 despite showing similar preferences for given health states when using other types of  
18  
19 355 valuation tasks [56, 58]. Hence, it is important that respondents with such attributes are  
20  
21 356 included in the study and locations such as day care facilities for young children and primary  
22  
23 357 schools will be selected to facilitate this. Questions relating to these attributes will be included  
24  
25  
26 358 in the background questions closing the interview, and as such will allow for sub-group  
27  
28 359 analysis of the effect of these attributes on the valuation of health in the Norwegian sample.  
29  
30

31 360  
32  
33 361 The derivation of values based on experienced health states is a recent development in the  
34  
35 362 field of health state valuation [48]. In recent years, there have been major developments in the  
36  
37 363 field of standardised protocols for health state valuation, including EuroQol EQ-VT. Such  
38  
39 364 standardisation is a long way off for experienced health state valuation and, as was the case  
40  
41  
42 365 for hypothetical health state valuation up until the last decade, there is considerable variation  
43  
44 366 in the choice of methods [60]. In Norway and other countries, the feasibility of collecting such  
45  
46  
47 367 data is still in its infancy, including choice of sampling strategies, recruitment and how to  
48  
49 368 minimise respondent burden. This study builds on existing methodology in the form of EQ-  
50  
51 369 VT protocol, to assess the feasibility of recruiting potential respondents (including from  
52  
53 370 health care settings) for experience-based health state valuation, respondent burden in the  
54  
55 371 form of completed interviews and data quality. The study design is constrained by the EQ-VT  
56  
57  
58 372 protocol, but the results of the study will inform the development of more appropriate  
59  
60



1  
2  
3 373 methodology in the future. Furthermore, the design will allow the comparison of results with  
4  
5 374 those for hypothetical health state valuation.  
6  
7  
8 375  
9  
10 376  
11  
12 377  
13

## 14 378 **Ethics and dissemination**

16  
17 379 The study was reviewed by The Regional Health Authority Research Ethics Committee and  
18  
19 380 found to be outside of the scope of the ethics committee thus not in need of ethical approval.  
20  
21 381 All study participants will give informed consent.  
22  
23

24 382 The final scoring algorithm will contribute to the quality and relevance of the results of EQ-  
25  
26 383 5D applications in Norway, and it is highly likely that, when available, the EQ-5D-5L with a  
27  
28 384 Norwegian scoring algorithm will be the recommended instrument of choice for future  
29  
30 385 economic evaluations undertaken in Norway by the pharmaceutical industry and other  
31  
32 386 important users. Application of the same instrument and scoring across the health services and  
33  
34 387 industry will further enhance decision-making relating to scarce health care resources.  
35  
36 388 Moreover, scores based on Norwegian preferences will further enhance the appropriateness of  
37  
38 389 the EQ-5D in clinical and health services research and quality indicators work, including the  
39  
40 390 national quality registers.  
41  
42  
43  
44

45 391  
46  
47 392 The study results will be published in peer-review scientific journals, presented at appropriate  
48  
49 393 forums, including national and international conferences, and scoring algorithms made  
50  
51 394 publicly available for R, Stata and other widely used statistical software. Presentations will be  
52  
53 395 given to users of the research, including research centres that widely use the EQ-5D in  
54  
55 396 clinical, health services and health economics research in Norway.  
56  
57  
58  
59  
60 397

1  
2  
3  
4 398 **List of abbreviations**

5 399 EQ-VT EuroQol Valuation Technology

6  
7  
8 400 cTTO Composite time trade-off

9  
10  
11 401 DCE Discrete choice experiments

12  
13  
14 402 QALY Quality Adjusted Life Year

15  
16  
17 403 PROMs Patient Reported Outcomes Measures

18  
19  
20 404 NQR National Quality Registries

21  
22  
23 405 NICE National Institute for Health and Care Excellence

24  
25  
26 406 NIPH Norwegian Institute of Public Health

27  
28  
29 407 QC Quality control software included in the EQ-VT software

30  
31  
32 408

33  
34  
35 409

36  
37  
38 410 **Declarations**

39 411 **Competing interests**

40  
41  
42 412 The authors have no competing interests.

43  
44  
45 413 **Availability of data and material**

46  
47  
48 414 Not applicable.

49  
50  
51 415 **Funding**

52  
53  
54 416 The study is funded by the Norwegian Research Council (grant number: 262673) with  
55  
56 417 additional support from the EuroQol Foundation (EQ Project 20190280) and Norwegian  
57  
58 418 Institute of Public Health.  
59  
60

## 419 Author contributions

420 AG conceived the study and secured funding. TMH, YH and AG designed the study. LA, KR  
 421 and KS commented and recommended revisions. . TMH and AG drafted and revised the  
 422 manuscript. YH, LA, KR and KS have read and approved the final version. All authors agree  
 423 to be accountable for all aspects of the work.

424

## 425 References

- 426 1. Hagen, G.W., T.; Klemp, M.; *Helseøkonomisk evaluering ved Nasjonal kunnskapssenter for*  
 427 *helsetjenesten*. Norsk Epidemiologi, 2013. **23**(2): p. 157-164.
- 428 2. *Guidelines for the submission of documentation for single technology assessment (STA) of*  
 429 *pharmaceuticals*. 2018, Statens Legemiddelverk (National Medicine Agency).
- 430 3. Ottersen, T., et al., *A new proposal for priority setting in Norway: Open and fair*. Health  
 431 Policy, 2016. **120**(3): p. 246-51.
- 432 4. *På ramme alvor: alvorlighets og prioritering*. 2015, Report from working group appointed by  
 433 Norwegian Ministry of Health and Care Services.
- 434 5. *Principles for priority setting in health care— Summary of a white paper on priority setting in*  
 435 *the Norwegian health care sector 2015*, Norwegian Ministry of Health and Care Services.
- 436 6. Drummond MF, S.M., Torrance G, O'Brien B, Stoddart G. , *Methods for the economic*  
 437 *evaluation of health care programmes*. 3rd edition ed. 2005: Oxford University Press.
- 438 7. Devlin, N.J. and R. Brooks, *EQ-5D and the EuroQol Group: Past, Present and Future*. Appl  
 439 Health Econ Health Policy, 2017. **15**(2): p. 127-137.
- 440 8. Garratt, A., et al., *Quality of life measurement: bibliographic study of patient assessed health*  
 441 *outcome measures*. BMJ, 2002. **324**(7351): p. 1417.
- 442 9. Nord, E., *Cost-Value Analysis in Health Care: Making Sense out of QALYS*. 1999: Cambridge  
 443 University Press.
- 444 10. Wisloff, T., et al., *Estimating QALY Gains in Applied Studies: A Review of Cost-Utility Analyses*  
 445 *Published in 2010*. Pharmacoeconomics, 2014. **32**(4): p. 367-375.
- 446 11. EuroQol. *EQ-5D-5L | Self-complete version on paper*. 24.02.2020]; Available from:  
 447 [https://euroqol.org/eq-5d-instruments/eq-5d-5l-available-modes-of-administration/self-](https://euroqol.org/eq-5d-instruments/eq-5d-5l-available-modes-of-administration/self-complete-on-paper/)  
 448 [complete-on-paper/](https://euroqol.org/eq-5d-instruments/eq-5d-5l-available-modes-of-administration/self-complete-on-paper/).
- 449 12. EuroQol, *Sample UK English EQ-5D-5L Paper Self-complete version*.
- 450 13. Szende A, O.M., Devlin N (Eds.) *EQ-5D Value Sets: Inventory, Comparative Review and User*  
 451 *Guide*. 2007, Springer: Dordrecht, The Netherlands.
- 452 14. Devlin, N.J., et al., *Valuing health-related quality of life: An EQ-5D-5L value set for England*.  
 453 Health Econ, 2018. **27**(1): p. 7-22.
- 454 15. Ludwig, K., J.M. Graf von der Schulenburg, and W. Greiner, *German Value Set for the EQ-5D-*  
 455 *5L*. Pharmacoeconomics, 2018. **36**(6): p. 663-674.
- 456 16. Augustovski, F., et al., *An EQ-5D-5L value set based on Uruguayan population preferences*.  
 457 Qual Life Res, 2016. **25**(2): p. 323-33.
- 458 17. Hobbins, A., et al., *Utility Values for Health States in Ireland: A Value Set for the EQ-5D-5L*.  
 459 Pharmacoeconomics, 2018. **36**(11): p. 1345-1353.
- 460 18. Kim, S.H., et al., *The EQ-5D-5L valuation study in Korea*. Qual Life Res, 2016. **25**(7): p. 1845-  
 461 52.

- 1  
2  
3 462 19. Luo, N., et al., *Estimating an EQ-5D-5L Value Set for China*. Value Health, 2017. **20**(4): p. 662-  
4 463 669.
- 5 464 20. M, M.V., et al., *Dutch Tariff for the Five-Level Version of EQ-5D*. Value Health, 2016. **19**(4): p.  
6 465 343-52.
- 7 466 21. Pattanaphesaj, J., et al., *The EQ-5D-5L Valuation study in Thailand*. Expert Rev Pharmacoecon  
8 467 Outcomes Res, 2018. **18**(5): p. 551-558.
- 9 468 22. Purba, F.D., et al., *The Indonesian EQ-5D-5L Value Set*. Pharmacoeconomics, 2017. **35**(11): p.  
10 469 1153-1165.
- 11 470 23. Shafie, A.A., et al., *EQ-5D-5L Valuation for the Malaysian Population*. Pharmacoeconomics,  
12 471 2018.
- 13 472 24. Wong, E.L.Y., et al., *Assessing the Use of a Feedback Module to Model EQ-5D-5L Health States*  
14 473 *Values in Hong Kong*. Patient, 2018. **11**(2): p. 235-247.
- 15 474 25. Xie, F., et al., *A Time Trade-off-derived Value Set of the EQ-5D-5L for Canada*. Med Care,  
16 475 2016. **54**(1): p. 98-105.
- 17 476 26. Solberg, T.K., et al., *Health-related quality of life assessment by the EuroQol-5D can provide*  
18 477 *cost-utility data in the field of low-back surgery*. European spine journal : official publication  
19 478 of the European Spine Society, the European Spinal Deformity Society, and the European  
20 479 Section of the Cervical Spine Research Society, 2005. **14**(10): p. 1000-7.
- 21 480 27. Nilsson, E., L. Orwelius, and M. Kristenson, *Patient-reported outcomes in the Swedish*  
22 481 *National Quality Registers*. Journal of internal medicine, 2016. **279**(2): p. 141-53.
- 23 482 28. Hernández-Alava, M.P., S; Wailoo, A;, *Quality review of a proposed EQ-5D-5L value set for*  
24 483 *England*. 2018, Policy Research Unit in Economic Evaluation of Health and Care Interventions.  
25 484 Universities of Sheffield and York.: EEPRU Research Report 060.
- 26 485 29. *Position statement on use of the EQ-5D-5L valuation set for England (updated November*  
27 486 *2019)*. National Institute for Health and Care Excellence 2019 05.02.2019]; Available from:  
28 487 [https://www.nice.org.uk/about/what-we-do/our-programmes/nice-guidance/technology-](https://www.nice.org.uk/about/what-we-do/our-programmes/nice-guidance/technology-appraisal-guidance/eq-5d-5l)  
29 488 [appraisal-guidance/eq-5d-5l](https://www.nice.org.uk/about/what-we-do/our-programmes/nice-guidance/technology-appraisal-guidance/eq-5d-5l).
- 30 489 30. Dolan, P., *Modeling valuations for EuroQol health states*. Medical care, 1997. **35**(11): p. 1095-  
31 490 108.
- 32 491 31. van Hout, B., et al., *Interim scoring for the EQ-5D-5L: mapping the EQ-5D-5L to EQ-5D-3L*  
33 492 *value sets*. Value Health, 2012. **15**(5): p. 708-15.
- 34 493 32. Kularatna, S., et al., *Mapping Sri Lankan EQ-5D-3L to EQ-5D-5L Value Sets*. Value Health Reg  
35 494 Issues, 2017. **12**: p. 20-23.
- 36 495 33. Golicki, D., et al., *Interim EQ-5D-5L Value Set for Poland: First Crosswalk Value Set in Central*  
37 496 *and Eastern Europe*. Value Health Reg Issues, 2014. **4**: p. 19-23.
- 38 497 34. Olsen, J.A., A.N. Lamu, and J. Cairns, *In search of a common currency: A comparison of seven*  
39 498 *EQ-5D-5L value sets*. Health Econ, 2018. **27**(1): p. 39-49.
- 40 499 35. Bailey, H. and P. Kind, *Preliminary findings of an investigation into the relationship between*  
41 500 *national culture and EQ-5D value sets*. Qual Life Res, 2010. **19**(8): p. 1145-54.
- 42 501 36. Burstrom, K., et al., *Swedish experience-based value sets for EQ-5D health states*. Qual Life  
43 502 Res, 2014. **23**(2): p. 431-42.
- 44 503 37. Leidl, R. and P. Reitmeir, *An Experience-Based Value Set for the EQ-5D-5L in Germany*. Value  
45 504 Health, 2017. **20**(8): p. 1150-1156.
- 46 505 38. Sun, S., et al., *Experience-based VAS values for EQ-5D-3L health states in a national general*  
47 506 *population health survey in China*. Qual Life Res, 2015. **24**(3): p. 693-703.
- 48 507 39. NICE, *Guide to the methods of technology appraisal*. 2008: National Institute for Health and  
49 508 Clinical Excellence: London.
- 50 509 40. Brazier, J., et al., *Should patients have a greater role in valuing health states?* Appl Health  
51 510 Econ Health Policy, 2005. **4**(4): p. 201-8.
- 52 511 41. Dolan, P., *Thinking about it: thoughts about health and valuing QALYs*. Health Economics,  
53 512 2011. **20**(12): p. 1407-1416.
- 54  
55  
56  
57  
58  
59  
60

- 1  
2  
3 513 42. *Stivarga kommer inte att ingå i högkostnadsskyddet. [Stivarga will not be reimbursed]*  
4 514 T.D.a.P.B.A. (TLV). Editor. 2014, TLV: Stockholm.
- 5 515 43. Leidl, R. and P. Reitmeir, *A value set for the EQ-5D based on experienced health states:*  
6 516 *development and testing for the German population.* Pharmacoeconomics, 2011. **29**(6): p.  
7 517 521-34.
- 8 518 44. De Wit, G.A., J.J.V. Busschbach, and F.T. De Charro, *Sensitivity and perspective in the*  
9 519 *valuation of health status: whose values count?* Health Economics, 2000. **9**(2): p. 109-126.
- 10 520 45. Dolan, P., *NICE should value real experiences over hypothetical opinions.* Nature, 2009.  
11 521 **462**(7269): p. 35.
- 12 522 46. Heijink, R., P. Reitmeir, and R. Leidl, *International comparison of experience-based health*  
13 523 *state values at the population level.* Health Qual Life Outcomes, 2017. **15**(1): p. 138.
- 14 524 47. Dolan, P. and D. Kahneman, *Interpretations Of Utility And Their Implications For The*  
15 525 *Valuation Of Health\**. The Economic Journal, 2008. **118**(525): p. 215-234.
- 16 526 48. Cubi-Molla, P., K. Shah, and K. Burström, *Experience-Based Values: A Framework for*  
17 527 *Classifying Different Types of Experience in Health Valuation Research.* The Patient - Patient-  
18 528 *Centered Outcomes Research*, 2018. **11**(3): p. 253-270.
- 19 529 49. Oppe, M., et al., *A program of methodological research to arrive at the new international EQ-*  
20 530 *5D-5L valuation protocol.* Value Health, 2014. **17**(4): p. 445-53.
- 21 531 50. Oppe, M., et al., *EuroQol Protocols for Time Trade-Off Valuation of Health Outcomes.*  
22 532 *PharmacoEconomics*, 2016. **34**(10): p. 993-1004.
- 23 533 51. Galea, S. and M. Tracy, *Participation Rates in Epidemiologic Studies.* Annals of Epidemiology,  
24 534 2007. **17**(9): p. 643-653.
- 25 535 52. *Microdata.no*. 2019 12.03.2019]; Available from: <https://microdata.no/en/>
- 26 536 53. Purba, F.D., et al., *Employing quality control and feedback to the EQ-5D-5L valuation protocol*  
27 537 *to improve the quality of data collection.* Qual Life Res, 2017. **26**(5): p. 1197-1208.
- 28 538 54. Ramos-Goñi, J.M., et al., *Quality Control Process for EQ-5D-5L Valuation Studies.* Value in  
29 539 *Health*, 2017. **20**(3): p. 466-473.
- 30 540 55. Stolk, E., et al., *Overview, Update, and Lessons Learned From the International EQ-5D-5L*  
31 541 *Valuation Work: Version 2 of the EQ-5D-5L Valuation Protocol.* Value Health, 2019. **22**(1): p.  
32 542 23-30.
- 33 543 56. van Nooten, F., et al., *What should we know about the person behind a TTO?* The European  
34 544 *Journal of Health Economics*, 2018. **19**(9): p. 1207-1211.
- 35 545 57. Craig, B.M., et al., *Demographic differences in health preferences in the United States.* Med  
36 546 *Care*, 2014. **52**(4): p. 307-13.
- 37 547 58. van der Pol, M. and A. Shiell, *Extrinsic Goals and Time Tradeoff.* Medical Decision Making,  
38 548 2007. **27**(4): p. 406-413.
- 39 549 59. van Nooten, F.E., et al., *"Married with children" the influence of significant others in TTO*  
40 550 *exercises.* Health and Quality of Life Outcomes, 2015. **13**(1): p. 94.
- 41 551 60. Helgesson, G., et al., *Whom should we ask? A systematic literature review of the arguments*  
42 552 *regarding the most accurate source of information for valuation of health states.* Qual Life  
43 553 *Res*, 2020.

554

555

## 556 Tables

557 Table 1: Locations for recruitment of participants, by age group and health status

|         |                |
|---------|----------------|
| Healthy | Reduced health |
|---------|----------------|

| Young                                        | Middle-aged                               | Elderly                                        | All ages       | All ages               |
|----------------------------------------------|-------------------------------------------|------------------------------------------------|----------------|------------------------|
| Places of higher education                   | Workplaces                                | Eldery homes                                   | Public library | Hospitals              |
| Child daycare facilities/<br>Primary schools | Recreational organisations (sports teams) | Recreational organisations (choirs/orchestras) | Town hall      | Rehabilitation centres |
| Social welfare*                              | Social welfare*<br>Adult education*       | Community volunteer centres                    |                | Health centres         |

558 \*Locations chosen to increase participation of those with lower socio-economic status

559 Table 2: Example sampling of hospital catchment areas and quotas per catchment area

| Region        | Population in region | Catchment area | Population in catchment area | Quota per catchment area |
|---------------|----------------------|----------------|------------------------------|--------------------------|
| Northern      | 381907               | Hospital 1     | 130000                       | 140                      |
| Central       | 560690               | Hospital 2     | 60000                        | 205                      |
| Western       | 843899               | Hospital 3     | 330000                       | 309                      |
| South-Eastern | 2299890              | Hospital 4     | 500000                       | 448                      |
| South-Eastern | “                    | Hospital 5     | 160000                       | 143                      |
| South-Eastern | “                    | Hospital 6     | 280000                       | 251                      |

560

561 Table 3: Example of quotas within a sampled catchment area based on the composition of sex,  
562 age and educational level in the general population of the respective region (source: Official  
563 statistics for 2017 generated from microdata.no). Example given sampling scenario and  
564 catchment area for Hospital 1 in Table 2.

| Sex                       | Highest attained educational level | Age groups |       |       |       |       |       |     | Total quota per sex and educational level |
|---------------------------|------------------------------------|------------|-------|-------|-------|-------|-------|-----|-------------------------------------------|
|                           |                                    | 18-24      | 25-34 | 35-44 | 45-54 | 55-64 | 65-74 | 75+ |                                           |
| Male                      | Primary or secondary               | 8          | 9     | 8     | 9     | 9     | 7     | 5   | 56                                        |
|                           | Tertiary                           | 1          | 3     | 3     | 3     | 3     | 2     | 1   | 16                                        |
| Female                    | Primary or secondary               | 7          | 6     | 5     | 7     | 8     | 8     | 7   | 47                                        |
|                           | Tertiary                           | 1          | 5     | 5     | 5     | 3     | 2     | 1   | 22                                        |
| Total quota per age group |                                    | 17         | 22    | 22    | 25    | 22    | 18    | 14  | 140                                       |

565

566 Table 4. Reference data for the calculation of quotas, data for 2018 (<http://microdata.no>,  
567 Statistics Norway, data accessed: 12.03.2019)

| Region | Sex | Highest attained educational level | Age group |       |       |       |       |       |     |
|--------|-----|------------------------------------|-----------|-------|-------|-------|-------|-------|-----|
|        |     |                                    | 18-24     | 25-34 | 35-44 | 45-54 | 55-64 | 65-74 | 75+ |

|                      |        |                      |         |         |         |         |         |         |         |
|----------------------|--------|----------------------|---------|---------|---------|---------|---------|---------|---------|
| South-Eastern region | Male   | Primary or secondary | 117 220 | 130 448 | 133 470 | 143 252 | 119 278 | 94 473  | 62 167  |
|                      |        | Tertiary             | 13 603  | 72 661  | 77 273  | 66 785  | 51 553  | 40 368  | 19 650  |
|                      | Female | Primary or secondary | 100 571 | 94 904  | 99 033  | 120 226 | 114 228 | 107 739 | 103 859 |
|                      |        | Tertiary             | 24 196  | 104 395 | 101 833 | 79 908  | 55 565  | 34 126  | 17 126  |
| Western region       | Male   | Primary or secondary | 48 863  | 54 616  | 52 141  | 54 172  | 44 925  | 34 032  | 23 977  |
|                      |        | Tertiary             | 5 129   | 26 041  | 27 176  | 21 446  | 17 552  | 12 302  | 5 291   |
|                      | Female | Primary or secondary | 40 743  | 35 932  | 34 778  | 42 701  | 40 672  | 36 866  | 38 127  |
|                      |        | Tertiary             | 9 928   | 39 550  | 36 796  | 27 107  | 18 494  | 9 777   | 4 750   |
| Central region       | Male   | Primary or secondary | 32 425  | 33 771  | 32 095  | 36 110  | 32 525  | 26 289  | 18 441  |
|                      |        | Tertiary             | 3 674   | 15 730  | 15 703  | 13 497  | 11 291  | 8 664   | 3 521   |
|                      | Female | Primary or secondary | 26 707  | 21 526  | 21 130  | 28 292  | 29 998  | 28 218  | 28 275  |
|                      |        | Tertiary             | 6 456   | 23 177  | 22 577  | 18 320  | 12 267  | 6 980   | 3 024   |
| Northern region      | Male   | Primary or secondary | 22 976  | 23 320  | 21 793  | 25 812  | 23 582  | 20 282  | 13 464  |
|                      |        | Tertiary             | 1 736   | 7 895   | 8 724   | 9 427   | 7 450   | 5 273   | 1 845   |
|                      | Female | Primary or secondary | 18 357  | 15 382  | 14 562  | 19 478  | 20 589  | 20 492  | 19 767  |
|                      |        | Tertiary             | 3 470   | 13 212  | 14 402  | 13 721  | 8 872   | 4 300   | 1 707   |

568

569 **Figures**

570

571 Figure 1: Hospitals with Acute Care Function in Norway

572 Figure 2: Screenshot of visual aid for cTTO task in EQ-VT

573 Figure 3: Screenshot of visual aid for DCE task in EQ-VT

574 Figure 4: Screenshot of the feedback module in EQ-VT

1  
2  
3  
4  
5  
6  
7  
8  
9  
10  
11  
12  
13  
14  
15  
16  
17  
18  
19  
20  
21  
22  
23  
24  
25  
26  
27  
28  
29  
30  
31  
32  
33  
34  
35  
36  
37  
38  
39  
40  
41  
42  
43  
44  
45  
46  
47  
48  
49  
50  
51  
52  
53  
54  
55  
56  
57  
58  
59  
60



Figure 1: Hospitals with Acute Care Function in Norway



1  
2  
3  
4  
5  
6  
7  
8  
9  
10  
11  
12  
13  
14  
15  
16  
17  
18  
19  
20  
21  
22  
23  
24  
25  
26  
27  
28  
29  
30  
31  
32  
33  
34  
35  
36  
37  
38  
39  
40  
41  
42  
43  
44  
45  
46  
47  
48  
49  
50  
51  
52  
53  
54  
55  
56  
57  
58  
59  
60



Figure 2: Screenshot of visual aid for cTTO task in EQ-VT (source: EuroQol Foundation)



Figure 3: Screenshot of visual aid for DCE task in EQ-VT (source: EuroQoI Foundation)



Figure 4: Screenshot of the feedback module in EQ-VT (source: EuroQol Foundation)
